# Supplementary material
Source: publisher figshare collection journal article supplement (https://acs.figshare.com/ndownloader/files/31308092)

# High-Throughput Experimentation Enabling Rapid Process Optimization of an RSV Drug Candidate

*Xavier Jusseau,<sup>1</sup> Ed Cleator,<sup>1</sup> William M. Maton,<sup>1</sup> Qinghao Chen,<sup>1</sup> Robert Geertman,<sup>1</sup> Yuanyuan Yuan,<sup>2</sup> Xiaowei Wang,<sup>3</sup> Haojuan Wei,<sup>2</sup> Florian Medina,<sup>1,\*</sup> Massimo Giannerini<sup>1,\*</sup>*

<sup>1</sup> Chemical Process Research and Development, Janssen Pharmaceutica, Turnhoutseweg 30, 2340 Beerse, Belgium

<sup>2</sup> Changzhou SynTheAll Pharmaceutical Co., Ltd., 589 North Yulong Road, XinBei District, Changzhou 213127, China

<sup>3</sup> Shanghai SynTheAll Pharmaceutical Co., Ltd., 90 Delin Road, Waigaoqiao Free Trade Zone, Shanghai 200131, China

## Supporting Information

|                                                                                              |    |
|----------------------------------------------------------------------------------------------|----|
| I] General procedure for HTE screening: .....                                                | 2  |
| II] HTE screening for the Pyrazolopyrimidine core 5: .....                                   | 2  |
| III] HTE screening for the resolution of the chiral Amine 8: .....                           | 4  |
| IV] HTE screening for the Borylation of 14: .....                                            | 6  |
| V] HTE screening for the Palladium catalysed Suzuki step between 19 and 9: .....             | 9  |
| VI] HTE screening for the Palladium catalysed telescope sequence Borylation/Suzuki:.....     | 10 |
| VII] Synthesis of (1S,2S)-2-(4-bromo-3-fluorophenyl)cyclopropane-1-carboxylic acid 14: ..... | 12 |
| VIII] NMR spectra of isolated intermediates: .....                                           | 15 |
| IX] Original and new synthesis route description (PMI included): .....                       | 32 |

## I] General procedure for HTE screening:

All screening experiments described were carried out under a nitrogen atmosphere filled glove box. Solvents were purchased from Sigma Aldrich, anhydrous, sure-seal quality, and used without further purification. Biphenyl (0.2 equivalent to limiting reagent) was used as internal standard for all screenings, introduced as stock solution with the corresponding starting materials. Reactions were run in vials contained in 96-well aluminum reactor block. Once reaction mixtures were prepared, stirring bar was added to each vial, and reactor top was screw on with two Silicon/rubber mats and one PFA mat to avoid any leakage (all reactors and mats were bought from Analytical Sales & Services). Reactor block was then placed in a tumble stirrer at the desired temperature for overnight. Once cooled down, reaction mixtures were diluted with ACN (two times the amount of solvent used for the reaction) and let to stir at room temperature for few minutes to homogenize. Finally, a representative aliquot was analyzed by HPLC at 220 nm.

## II] HTE screening for the Pyrazolopyrimidine core 5:

### Scheme S1: Pyrazolopyrimidine core 5 synthesis with putative isomers structures.

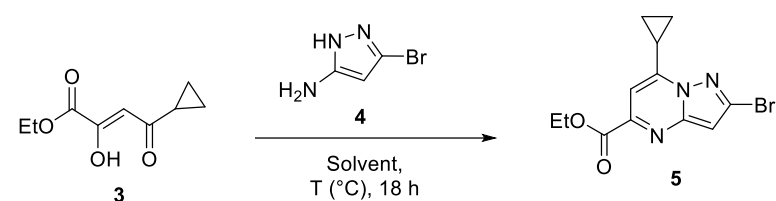

#### Isomers

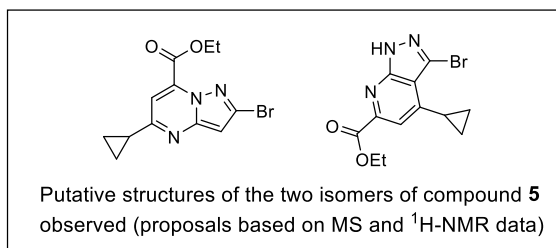

Full data sets obtained across the 3 screenings performed are listed in the SuppInfo\_Screening\_Data excel file.

- 1<sup>st</sup> screening: CentralCore S1
  - 2<sup>nd</sup> screening: CentralCore S2
  - 3<sup>rd</sup> screening: CentralCore S3
- Screening conditions, first screening:  
**Substrate:** 30.0  $\mu\text{mol}$  **4**, 39.0  $\mu\text{mol}$  **3** and 6.0  $\mu\text{mol}$  **IS** in each vial  
**Additive:** 2.0 equiv., 10.0 equiv. H<sub>2</sub>O or 0.2 X Activated 4A-MS in each vial or not  
**Base or Acid:** 1.0 equiv. or 3.0 equiv. Base or acid in each vial or not  
**Solvent:** 94.0  $\mu\text{L}$  EtOH (20.0 L/kg) in each vial  
**T:** 30 °C  
**Time:** 18 h

| Additive              | Base or Acid | TFA | TCA | DIPEA | MeNCy2 | N/A |
|-----------------------|--------------|-----|-----|-------|--------|-----|
| 2.0 equiv. H2O        | 1.0 equiv.   |     |     |       |        |     |
|                       | 3.0 equiv.   |     |     |       |        |     |
| 10.0 equiv. H2O       | 1.0 equiv.   |     |     |       |        |     |
|                       | 3.0 equiv.   |     |     |       |        |     |
| 0.2 X Activated 4A-MS | 1.0 equiv.   |     |     |       |        |     |
|                       | 3.0 equiv.   |     |     |       |        |     |
| N/A                   | 1.0 equiv.   |     |     |       |        |     |
|                       | 3.0 equiv.   |     |     |       |        |     |

- Screening conditions, second screening:  
**Substrate:** 50.0  $\mu\text{mol}$  **4**, 65.0  $\mu\text{mol}$  **3** and 10.0  $\mu\text{mol}$  **IS** in each vial  
**Acid:** 1.0 equiv. to 0.1 equiv. TFA in each vial or not  
**Additive:** 15.0 equiv., 30.0 equiv. H<sub>2</sub>O or 50.0 equiv. H<sub>2</sub>O in each vial or not  
**Solvent:** 160  $\mu\text{L}$  EtOH (20.0 L/kg) in each vial  
**T:** 30 °C  
**Time:** 18 h

| Additive        | TFA     |         |         |         |     |
|-----------------|---------|---------|---------|---------|-----|
|                 | 1.0 eq. | 0.5 eq. | 0.3 eq. | 0.1 eq. | N/A |
| N/A             |         |         |         |         |     |
| 15.0 equiv. H2O |         |         |         |         |     |
| 30.0 equiv. H2O |         |         |         |         |     |
| 50.0 equiv. H2O |         |         |         |         |     |

- Screening conditions, third screening:  
**Substrate:** 30.0  $\mu\text{mol}$  **4**, 39.0  $\mu\text{mol}$  **3** and 6.0  $\mu\text{mol}$  **IS** in each vial  
**Base or Acid:** 1.5 equiv., 3.0 equiv. or 5.0 equiv. Base or acid in each vial or not

**Additives:** 2.0 equiv., 10.0 equiv. H<sub>2</sub>O or 0.2 X Activated 4A-MS in each vial

**Solvent:** 94.0 µL EtOH (10.0 L/kg) in each vial

**T:** 70 °C

**Time:** 18 h

| Additive                     | Base       | TEA | DIPEA | MeNCy2 | NMethylMorpholine | 1-MeImidazole | DABCO | TFA | MSA | CSA | TCA | N/A |
|------------------------------|------------|-----|-------|--------|-------------------|---------------|-------|-----|-----|-----|-----|-----|
| 2.0 equiv. H <sub>2</sub> O  | 5.0 equiv. |     |       |        |                   |               |       |     |     |     |     |     |
|                              | 3.0 equiv. |     |       |        |                   |               |       |     |     |     |     |     |
|                              | 1.5 equiv. |     |       |        |                   |               |       |     |     |     |     |     |
| 10.0 equiv. H <sub>2</sub> O | 5.0 equiv. |     |       |        |                   |               |       |     |     |     |     |     |
|                              | 3.0 equiv. |     |       |        |                   |               |       |     |     |     |     |     |
|                              | 1.5 equiv. |     |       |        |                   |               |       |     |     |     |     |     |
| 0.2 X Activated 4A-MS        | 5.0 equiv. |     |       |        |                   |               |       |     |     |     |     |     |
|                              | 3.0 equiv. |     |       |        |                   |               |       |     |     |     |     |     |
|                              | 1.5 equiv. |     |       |        |                   |               |       |     |     |     |     |     |

### III] HTE screening for the resolution of the chiral Amine 8:

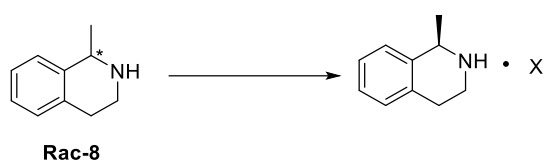

Full data sets obtained across the 2 screenings performed are listed in the SuppInfo\_Screening\_Data excel file. Only heterogeneous samples were analyzed, after filtration both solid and ML were analyzed.

- 1<sup>st</sup> screening: Resolution S1
- 2<sup>nd</sup> screening: Resolution S2
- Screening conditions, first screening:
 

**Substrate:** 250 µmol *rac-8* in each vial

**Acid:** 150 µmol Chiral Acid in each vial

**Solvent:** 368.0 µL Solvent (20.0 L/kg) in each vial

**T:** 45 °C for 1 h, and then 20 to 25 °C for 18 h

**Time:** 45 °C for 1 h, and then 20 to 25 °C for 18 h

|  |    |    |    |    |    |    |    |    |    |    |    |    |
|--|----|----|----|----|----|----|----|----|----|----|----|----|
|  | 1  | 2  | 3  | 4  | 5  | 6  | 7  | 8  | 9  | 10 | 11 | 12 |
|  | 13 | 14 | 15 | 16 | 17 | 18 | 19 | 20 | 21 | 22 | 23 | 24 |



|      |   |  |  |  |  |  |  |  |  |  |  |  |  |
|------|---|--|--|--|--|--|--|--|--|--|--|--|--|
| THF  | F |  |  |  |  |  |  |  |  |  |  |  |  |
| MeOH | G |  |  |  |  |  |  |  |  |  |  |  |  |
| EtOH | H |  |  |  |  |  |  |  |  |  |  |  |  |

| Location | Name                              | CAS        |
|----------|-----------------------------------|------------|
| 1        | (1S)-(+)-10-Camphorsulfonic acid  | 3144-16-9  |
| 2        | L-Cysteine                        | 52-90-4    |
| 3        | L-(+)-Mandelic acid               | 17199-29-0 |
| 4        | L-Threonine                       | 72-19-5    |
| 5        | Abietic acid                      | 514-10-3   |
| 6        | L-Pyroglutamic acid               | 98-79-3    |
| 7        | L-Valine                          | 72-18-4    |
| 8        | L-Histidine                       | 71-00-1    |
| 9        | (+)-Naproxen                      | 22204-53-1 |
| 10       | L-Isoleucine                      | 73-32-5    |
| 11       | L-Proline                         | 147-85-3   |
| 12       | (1S)-(-)-Camphanic acid           | 13429-83-9 |
| 13       | (S)-2-Acetoxy-2-phenylacetic acid | 7322-88-5  |
| 14       | trans-4-Hydroxy-L-proline         | 51-35-4    |
| 15       | L-Phenylalanine                   | 63-91-2    |
| 16       | L-Tyrosine                        | 60-18-4    |
| 17       | L-Lactic acid                     | 79-33-4    |
| 18       | L-Alanine                         | 56-41-7    |
| 19       | L-Asparagine                      | 70-47-3    |
| 20       | L-Glutamine                       | 56-85-9    |
| 21       | L-Isoleucine                      | 73-32-5    |
| 22       | L-Lysine                          | 56-87-1    |
| 23       | L-Methionine                      | 63-68-3    |
| 24       | L-2-Phenylglycine                 | 2935-35-5  |

#### IV] HTE screening for the Borylation of 14:

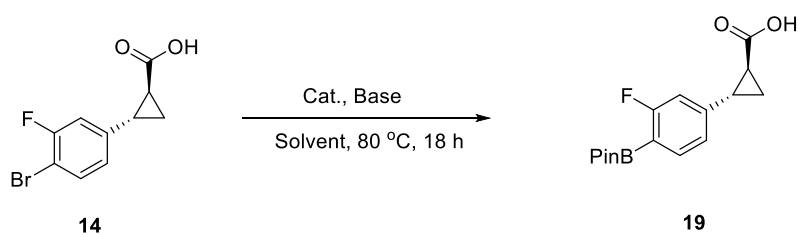

Full data sets obtained across the 3 screenings performed are listed in the SuppInfo\_Screening\_Data excel file.

- 1<sup>st</sup> screening: Borylation S1
- 2<sup>nd</sup> screening: Borylation S2
- 3<sup>rd</sup> screening: Borylation S3

- Screening conditions, first screening:

**Substrate:** 20.0  $\mu\text{mol}$  **14**, 24.0  $\mu\text{mol}$  **B<sub>2</sub>Pin<sub>2</sub>** and 4.0  $\mu\text{mol}$  **IS** in each vial

**Catalyst:** 5.0 mol% Pd(OAc)<sub>2</sub> in each vial

**Ligand:** 10.0 mol% P source in each vial

**Base:** 60.0  $\mu\text{mol}$  KOAc in each vial

**Solvent:** 104.0  $\mu\text{L}$  Solvent (20.0 L/kg) in each vial

**T:** 80 °C

**Time:** 18 h

|         |   | 1 | 2 | 3 | 4 | 5 | 6 | 7 | 8 | 9 | 10 | 11 | 12 |
|---------|---|---|---|---|---|---|---|---|---|---|----|----|----|
| 2-MeTHF | A |   |   |   |   |   |   |   |   |   |    |    |    |
|         | B |   |   |   |   |   |   |   |   |   |    |    |    |
|         | C |   |   |   |   |   |   |   |   |   |    |    |    |
|         | D |   |   |   |   |   |   |   |   |   |    |    | /  |
| Toluene | E |   |   |   |   |   |   |   |   |   |    |    |    |
|         | F |   |   |   |   |   |   |   |   |   |    |    |    |
|         | G |   |   |   |   |   |   |   |   |   |    |    |    |
|         | H |   |   |   |   |   |   |   |   |   |    |    | /  |

|     |                                                  |
|-----|--------------------------------------------------|
| A1  | Ph <sub>3</sub> P                                |
| A2  | dppb                                             |
| A3  | ( <i>o</i> -tol) <sub>3</sub> P                  |
| A4  | DPEPhos                                          |
| A5  | dppf                                             |
| A6  | <i>t</i> BuXPhos                                 |
| A7  | dtbpf                                            |
| A8  | Ph <sub>2</sub> CyP                              |
| A9  | Cy <sub>3</sub> P-HBF <sub>4</sub>               |
| A10 | XantPhos                                         |
| A11 | Ph <sub>2</sub> P( <i>t</i> Bu)                  |
| A12 | ( <i>t</i> Bu) <sub>2</sub> PMe-HBF <sub>4</sub> |
| B1  | <i>t</i> Bu <sub>3</sub> P-HBF <sub>4</sub>      |
| B2  | (2-furyl) <sub>3</sub> P                         |
| B3  | Cy <sub>2</sub> P( <i>o</i> -Tol)                |
| B4  | JohnPhos                                         |
| B5  | XPhos                                            |
| B6  | Ph <sub>2</sub> DavePhos                         |
| B7  | SPhos                                            |
| B8  | dcpp-HBF <sub>4</sub>                            |
| B9  | Ad <sub>2</sub> <i>n</i> BuP                     |
| B10 | RuPhos                                           |
| B11 | AmgenPhos                                        |
| B12 | ( <i>R</i> )-BINAP                               |
| C1  | dppp                                             |
| C2  | dppe                                             |
| C3  | (C <sub>6</sub> F <sub>5</sub> ) <sub>3</sub> P  |
| C4  | dpppe                                            |
| C5  | RockPhos                                         |
| C6  | MorDalPhos                                       |
| C7  | DavePhos                                         |
| C8  | MePhos                                           |
| C9  | <i>t</i> BuMePhos                                |
| C10 | dippf                                            |

|     |                                                            |
|-----|------------------------------------------------------------|
| C11 | <i>N</i> -XantPhos                                         |
| C12 | ( <i>o</i> -anisyl) <sub>3</sub> P                         |
| D1  | ( <i>R</i> )-Tol-BINAP                                     |
| D2  | (2,4,6-MeO <sub>3</sub> Phenyl) <sub>3</sub> P             |
| D3  | Ph <sub>2</sub> P-CH <sub>2</sub> CH <sub>2</sub> -(2-Pyr) |
| D4  | BrettPhos                                                  |
| D5  | BippyPhos                                                  |
| D6  | SPhos-SO <sub>3</sub> Na                                   |
| D7  | Me <sub>4</sub> - <i>t</i> BuXPhos                         |
| D8  | (4-CF <sub>3</sub> Phenyl) <sub>3</sub> P                  |
| D9  | Pd(dppf)Cl <sub>2</sub>                                    |
| D10 | Pd(Ph <sub>3</sub> P) <sub>2</sub> Cl <sub>2</sub>         |
| D11 | Pd(dtbpf)Cl <sub>2</sub>                                   |

- Screening conditions, Second screening:

**Substrate:** 25.0 μmol **14**, 30.0 μmol **B<sub>2</sub>Pin<sub>2</sub>** and 5.0 μmol **IS** in each vial

**Catalyst:** 2.0 mol% Pd(OAc)<sub>2</sub> in each vial

**Ligand:** 4.0 mol% P source in each vial

**Base:** 75.0 μmol Base in each vial

**Solvent:** 130.0 μL Solvent (20.0 L/kg) in each vial

**T:** 80 °C

**Time:** 18 h

|         |       |   | 1 | 2 | 3 | 4 | 5 | 6 | 7 | 8 | 9 | 10 | 11 | 12 |
|---------|-------|---|---|---|---|---|---|---|---|---|---|----|----|----|
| 2-MeTHF | KOAc  | A |   |   |   |   |   |   |   |   |   |    |    |    |
|         |       | B |   |   |   |   |   |   |   |   |   |    |    |    |
|         | DIPEA | C |   |   |   |   |   |   |   |   |   |    |    |    |
|         |       | D |   |   |   |   |   |   |   |   |   |    |    |    |
| Toluene | KOAc  | E |   |   |   |   |   |   |   |   |   |    |    |    |
|         |       | F |   |   |   |   |   |   |   |   |   |    |    |    |
|         | DIPEA | G |   |   |   |   |   |   |   |   |   |    |    |    |
|         |       | H |   |   |   |   |   |   |   |   |   |    |    |    |

|     |                                             |
|-----|---------------------------------------------|
| A1  | Ph <sub>3</sub> P                           |
| A2  | ( <i>o</i> -tol) <sub>3</sub> P             |
| A3  | DPEPhos                                     |
| A4  | Pd(dppf)Cl <sub>2</sub>                     |
| A5  | Pd(dtbpf)Cl <sub>2</sub>                    |
| A6  | Ph <sub>2</sub> CyP                         |
| A7  | XantPhos                                    |
| A8  | Ph <sub>2</sub> P( <i>t</i> Bu)             |
| A9  | <i>t</i> Bu <sub>3</sub> P-HBF <sub>4</sub> |
| A10 | XPhos                                       |
| A11 | SPhos                                       |
| A12 | dcpp-HBF <sub>4</sub>                       |
| B1  | Ad <sub>2</sub> <i>n</i> BuP                |
| B2  | RuPhos                                      |
| B3  | AmgenPhos                                   |
| B4  | ( <i>R</i> )-BINAP                          |
| B5  | dpppe                                       |
| B6  | MePhos                                      |
| B7  | dippf                                       |



|     |                                           |
|-----|-------------------------------------------|
| B8  | <i>N</i> -XantPhos                        |
| B9  | ( <i>o</i> -anisyl) <sub>3</sub> P        |
| B10 | ( <i>R</i> )-Tol-BINAP                    |
| B11 | SPhos-SO <sub>3</sub> Na                  |
| B12 | (4-CF <sub>3</sub> Phenyl) <sub>3</sub> P |

- Screening conditions, Third screening:

**Substrate:** 25.0 μmol **14**, 27.5 μmol **B<sub>2</sub>Pin<sub>2</sub>** and 5.0 μmol **IS** in each vial

**Catalyst:** 1.0 mol% Pd(OAc)<sub>2</sub> in each vial

**Ligand:** 2.0 mol% monodentate P ligand or 1.0 mol% bidentate P ligand (Pd: P = 1:2) in each vial

**Base:** 62.5 μmol KOAc or KOPiv in each vial

**Solvent:** 96.0 μL Solvent (15.0 L/kg) in each vial

**T:** 80 °C

**Time:** 18 h

|                |       | Ph <sub>3</sub> P | Ph <sub>2</sub> P( <i>t</i> Bu) | XPhos | SPhos | Ad <sub>2</sub> <i>n</i> BuP | RuPhos | AmgenPhos | dippf | <i>N</i> -XantPhos | ( <i>o</i> -anisyl) <sub>3</sub> P | SPhos-SO <sub>3</sub> Na | (4-CF <sub>3</sub> Phenyl) <sub>3</sub> P |
|----------------|-------|-------------------|---------------------------------|-------|-------|------------------------------|--------|-----------|-------|--------------------|------------------------------------|--------------------------|-------------------------------------------|
| <b>Toluene</b> | KOAc  |                   |                                 |       |       |                              |        |           |       |                    |                                    |                          |                                           |
|                | KOPiv |                   |                                 |       |       |                              |        |           |       |                    |                                    |                          |                                           |
| <b>THF</b>     | KOAc  |                   |                                 |       |       |                              |        |           |       |                    |                                    |                          |                                           |
|                | KOPiv |                   |                                 |       |       |                              |        |           |       |                    |                                    |                          |                                           |
| <b>2-MeTHF</b> | KOAc  |                   |                                 |       |       |                              |        |           |       |                    |                                    |                          |                                           |
|                | KOPiv |                   |                                 |       |       |                              |        |           |       |                    |                                    |                          |                                           |
| <b>IPAc</b>    | KOAc  |                   |                                 |       |       |                              |        |           |       |                    |                                    |                          |                                           |
|                | KOPiv |                   |                                 |       |       |                              |        |           |       |                    |                                    |                          |                                           |

#### V] HTE screening for the Palladium catalysed Suzuki step between **19** and **9**:

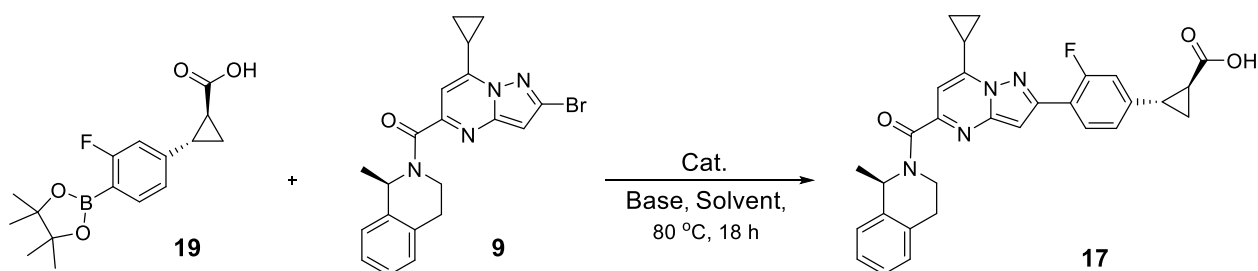

Full data set obtained across the screening performed is listed in the SuppInfo\_Screening\_Data excel file.

- 1<sup>st</sup> screening: Suzuki S1

- Screening conditions, First screening:  
**Substrate:** 25.0  $\mu\text{mol}$  **9**, 30.0  $\mu\text{mol}$  **19** and 5.0  $\mu\text{mol}$  **IS** in each vial  
**Catalyst:** 1.0 mol%  $\text{Pd}(\text{OAc})_2$  in each vial  
**Ligand:** 2.0 mol% P source in each vial  
**Base:** 37.5  $\mu\text{mol}$  Base in each vial  
**Solvent:** 103.0  $\mu\text{L}$  solvent (10.0 L/kg) with 31.0  $\mu\text{L}$   $\text{H}_2\text{O}$  (3.0 L/kg) in each vial  
**T:** 80  $^\circ\text{C}$   
**Time:** 18 h

|                |                         | $\text{Ph}_3\text{P}$ | $\text{Ph}_2\text{P}(t\text{Bu})$ | XPhos | SPhos | $\text{Ad}_2n\text{BuP}$ | RuPhos | AmgenPhos | dippf | N-XantPhos | ( <i>o</i> -anisyl) $_3\text{P}$ | SPhos- $\text{SO}_3\text{Na}$ | (4-CF $_3$ Phenyl) $_3\text{P}$ |
|----------------|-------------------------|-----------------------|-----------------------------------|-------|-------|--------------------------|--------|-----------|-------|------------|----------------------------------|-------------------------------|---------------------------------|
| <b>Toluene</b> | $\text{K}_3\text{PO}_4$ |                       |                                   |       |       |                          |        |           |       |            |                                  |                               |                                 |
|                | $\text{K}_2\text{CO}_3$ |                       |                                   |       |       |                          |        |           |       |            |                                  |                               |                                 |
| <b>THF</b>     | $\text{K}_3\text{PO}_4$ |                       |                                   |       |       |                          |        |           |       |            |                                  |                               |                                 |
|                | $\text{K}_2\text{CO}_3$ |                       |                                   |       |       |                          |        |           |       |            |                                  |                               |                                 |
| <b>2-MeTHF</b> | $\text{K}_3\text{PO}_4$ |                       |                                   |       |       |                          |        |           |       |            |                                  |                               |                                 |
|                | $\text{K}_2\text{CO}_3$ |                       |                                   |       |       |                          |        |           |       |            |                                  |                               |                                 |
| <b>IPAc</b>    | $\text{K}_3\text{PO}_4$ |                       |                                   |       |       |                          |        |           |       |            |                                  |                               |                                 |
|                | $\text{K}_2\text{CO}_3$ |                       |                                   |       |       |                          |        |           |       |            |                                  |                               |                                 |

## VI] HTE screening for the Palladium catalysed telescope sequence Borylation/Suzuki:

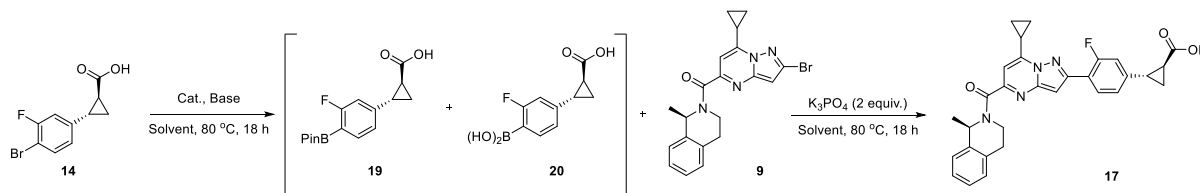

Full data set obtained across the screening performed is listed in the SuppInfo\_Screening\_Data excel file.

- 1<sup>st</sup> screening: Telescope S1
- Screening conditions, First screening:  
**Borylation reaction:**  
**Substrate:** 25.0  $\mu\text{mol}$  **14**, 27.5  $\mu\text{mol}$  **B<sub>2</sub>Pin<sub>2</sub>** and 5.0  $\mu\text{mol}$  **IS** in each vial  
**Catalyst:** 1.0 mol%  $\text{Pd}(\text{OAc})_2$  in each vial  
**Ligand:** 2.0 mol% monodentate P ligand or 1.0 mol% bidentate P ligand (Pd: P = 1:2) in each vial  
**Base:** 62.5  $\mu\text{mol}$  KOAc or KOPiv in each vial  
**Solvent:** 96.0  $\mu\text{L}$  Solvent (15.0 L/kg) in each vial

**T: 80 °C**

**Time:** 18 h

**Suzuki reaction:**

**Substrate:** 22.5  $\mu\text{mol}$  **9** in each vial

**Base:** 50.0  $\mu\text{mol}$   $\text{K}_3\text{PO}_4$  in each vial

**Solvent:** 32.0  $\mu\text{L}$  (5.0 L/kg) Solvent and 26.0  $\mu\text{L}$  (4.0 L/kg)  $\text{H}_2\text{O}$  in each vial

**T: 80 °C**

**Time:** 18 h[illegible]

#### VII] Synthesis of (1*S*,2*S*)-2-(4-bromo-3-fluorophenyl)cyclopropane-1-carboxylic acid 14:

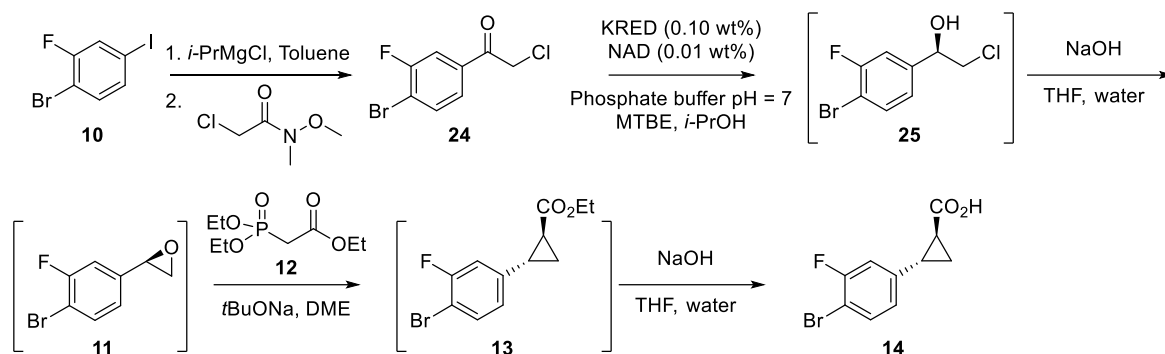

**Scheme 1:** Scale-up synthesis of (1*S*,2*S*)-2-(4-bromo-3-fluorophenyl)cyclopropane-1-carboxylic acid **14** from -bromo-2-fluoro-4-iodobenzene **10**.

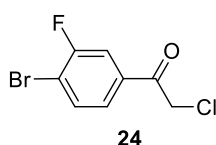

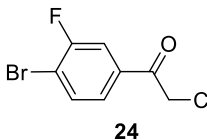  
**24**

To a reactor under nitrogen was charged 1-bromo-2-fluoro-4-iodobenzene **10** (79.8 mol, 24.0 kg, 1.00 equiv.), and anhydrous toluene (109 L). The reaction mixture was cooled down to -40 °C then isopropyl magnesium chloride (2.0 M in THF, 87.7 mol, 43.0 kg, 1.10 equiv.) was charged over 2.5h. Upon reaction completion, the reaction mixture was further cooled down to -78 °C. Then a solution of 2-chloro-N-methoxy-N-methylacetamide (87.7 mol, 12.0 kg, 1.10 equiv.) in anhydrous toluene (37 L) was charged over 2h, then the reaction mixture was warmed up to 25 °C over 2 h. Upon reaction completion, the reaction mixture was cooled to 5 °C and quenched by addition of aqueous citric acid (10 wt%, 90 kg) over 2.6 h to reach pH = 6-7. Water (120 L) was added and the mixture was extracted with MTBE (257 L) at 25 °C. The organic layer was washed with sodium sulfate (10 wt%, 188 kg) and the phase were separated. The organic layer was treated with diatomite (13 kg) and filtered. The resulting Toluene-THF-MTBE solution was concentrated under vacuum to remove MTBE and THF, then switched to isopropyl alcohol (60 L). The solution was cooled down to 30°C, seeded then further cooled to 20 °C over 2 h then water (86 L) was slowly added over 2h. The suspension was stirred for 4 h then filtered. The resulting solid was washed twice with water (48 L) and dried for 18h at 40 °C under

vacuum to afford 1-(4-bromo-3-fluorophenyl)-2-chloroethan-1-one **24** (15.8 kg, yield 79 %) as a white solid. <sup>1</sup>H NMR (400 MHz, 298 K, d6-DMSO): δ 7.94 (d, *J* = 6.8 Hz, 1H, Ar-H), 7.92 (dd, *J* = 7.2, 2.0 Hz, 1H, Ar-H), 7.74 (dd, *J* = 8.0, 2.0 Hz, 1H, Ar-H), 5.20 (s, 2H, CH<sub>2</sub>) ppm. <sup>13</sup>C NMR (100 MHz, 298 K, d6-DMSO): δ 190.1 (d, *J* = 2.0 Hz), 158.3 (d, *J* = 245 Hz), 135.6 (d, *J* = 6.0 Hz), 134.2, 125.7 (d, *J* = 2.0 Hz), 116.2 (d, *J* = 23.0 Hz), 114.5 (d, *J* = 21 Hz), 47.7 ppm. <sup>19</sup>F NMR (376.5 MHz, 298 K, d6-DMSO): δ -106.8 ppm.

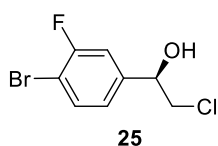

To a reactor under nitrogen was charged 1-(4-bromo-3-fluorophenyl)-2-chloroethan-1-one **24** (199.3 mol, 30.0 kg, 1.00 equiv.), MTBE (45 L), isopropyl alcohol (42 L), and water (46 L). The reaction mixture was warmed up to 40 °C then a phosphate buffer pH = 7.0, made of, potassium phosphate dibasic trihydrate (57 mol, 13.0 kg, 0.48 equiv.), potassium phosphate monobasic (37 mol, 5.0 kg, 0.31 equiv.), and sodium thiosulfate pentahydrate (1.2 mol, 0.3 kg, 0.01 equiv.) in water (472 L) containing KRED enzyme (3.1 kg, 0.10 wt%) and NAD co-factor (0.31 kg, 0.01 wt%) was charged over 1.5 h. Upon reaction completion, the reaction mixture was cooled to 25 °C and concentrated under vacuum to remove acetone. DCM (453 L) and diatomite (36 kg) were added, and the resulting biphasic mixture was filtered. The organic layer was separated, concentrated under vacuum and solvent was switched to THF (120 L) to afford (*R*)-1-(4-bromo-3-fluorophenyl)-2-chloroethan-1-ol **25** (22.0 wt%, 136 kg, 99.9 % e.e., 99 % yield) as a solution in THF.

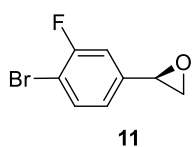

To a reactor under nitrogen was charged (*R*)-1-(4-bromo-3-fluorophenyl)-2-chloroethan-1-ol **25** (117.5 mol, 22.0 wt%, 136 kg, 1.00 equiv.) as a THF a solution and THF (56 L). The reaction mixture was warmed up to 25 °C then aqueous sodium hydroxide (15 wt%, 227.5 mol, 41.0 kg, 1.94 equiv.) was dosed over 3 h. Upon reaction completion, the reaction mixture was cooled to 15 °C and aqueous acetic acid (10.0

wt%, 40.0 kg) was added to reach pH = 7-8. Water (88 L) was added and the reaction mixture was extracted twice with ethyl acetate (2x150 L). The combined organic layers were washed with aqueous sodium sulphate (5.0 wt%, 162 kg) then concentrated under vacuum and solvent was switched to 1,2-dimethoxyethane (100 L) to afford (*R*)-2-(4-bromo-3-fluorophenyl)oxirane **11** (21.9 wt%, 115 kg, 99.9 % e.e. yield 98 %) as a solution in 1,2-dimethoxyethane.

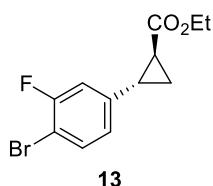

To a reactor under nitrogen was charged sodium *tert*-butoxide (239.3 mol, 23.0 kg, 2.1 equiv.) and 1,2-dimethoxyethane (800 L). The reaction mixture was warmed up to 25 °C and ethyl 1-(diethoxyphosphoryl)acetate (240.9 mol, 54.0 kg, 2.10 equiv.) was dosed over 1 h, followed by the addition of (*R*)-2-(4-bromo-3-fluorophenyl)oxirane **11** (21.9 wt%, 115.5 mol, 115 kg, 1.00 equiv.) as 1,2-dimethoxyethane solution over 1.5 h, then the mixture was warmed up to 80 °C. Upon reaction completion, the reaction mixture was cooled to 25 °C and quenched by the slow addition of acetic acid (100 mol, 6.0 kg, 0.90 equiv.). Water (206 L) was added and the reaction mixture was extracted with heptane (250 L). The phases were separated then the aqueous layer was extracted with ethyl acetate (250 L). The organic layers were combined, concentrated under vacuum and solvent was switched to THF (84 L) to afford ethyl (1*S*,2*S*)-2-(4-bromo-3-fluorophenyl)cyclopropane-1-carboxylate **13** (29.7 wt%, 106 kg, 95 % yield) as a solution in THF.

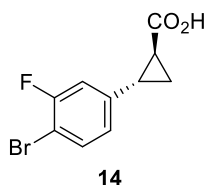

To a reactor under nitrogen was charged ethyl (1*S*,2*S*)-2-(4-bromo-3-fluorophenyl)cyclopropane-1-carboxylate **13** (29.7 wt%, 109.4 mol, 106 kg, 1.00 equiv.) as a THF solution. The reaction mixture was warmed up to 25 °C and aqueous sodium hydroxide (15.0 wt%, 322.5 mol, 86.0 kg, 3.00 equiv.) was charged. Upon reaction completion, water (270 L) was added followed by DCM (205 L). The phases were separated, and the aqueous layer was acidified to pH = 6-7 at 25°C with aqueous

hydrochloric acid (2.0 M, 52.0 kg). The reaction mixture was seeded then further acidified to pH = 2-3 at 25 °C with aqueous hydrochloric acid (2.0 M, 120 kg). The suspension was stirred for 5 h then filtered. The resulting solid was washed with water (70 L) and dried for 18 h at 50 °C under vacuum to afford (1*S*,2*S*)-2-(4-bromo-3-fluorophenyl)cyclopropane-1-carboxylic acid **14** (25.2 kg, 89.0 % yield) as a white solid. **<sup>1</sup>H NMR** (400 MHz, 298 K, d<sub>6</sub>-DMSO): δ 12.37 (s, 1H, OH), 7.56 (m, 1H, Ar-H), 7.21 (d, *J* = 10.4 Hz, 1H, Ar-H), 7.00 (t, *J* = 8.0 Hz, 1H, Ar-H), 2.47-2.37 (m, 1H, CH), 1.92-1.80 (m, 1H, CH), 1.49-1.31 (m, 2H, CH<sub>2</sub>) ppm. **<sup>13</sup>C NMR** (100 MHz, 298 K, d<sub>6</sub>-DMSO): δ 173.5, 158.3 (d, *J* = 243 Hz), 143.2 (d, *J* = 8.0 Hz), 133.1, 123.9 (d, *J* = 3.0 Hz), 114.2 (d, *J* = 24.0 Hz), 105.1 (d, *J* = 21.0 Hz), 24.53, 24.50, 17.0 ppm. **<sup>19</sup>F NMR** (376.5 MHz, 298 K, d<sub>6</sub>-DMSO): δ -108.6 ppm. All analytical data were aligned with reported literature: McCoull, W.; Bailey, A.; Barton, P.; Birch, A. M.; Brown, A. J. H.; Butler, H. S.; Boyd, S.; Butlin, R. J.; Chappell, B.; Clarkson, P.; Collins, S.; Davies, R. M. D.; Ertan, A.; Hammond, C. D.; Holmes, J. L.; Lenaghan, C.; Midha, A.; Morentin-Gutierrez, P.; Moore, J. E.; Raubo, P.; Robb, G. Indazole-6-phenylcyclopropylcarboxylic Acids as Selective GPR120 Agonists with in Vivo Efficacy. *J. Med. Chem.* **2017** *60*, 3187-3197.

#### VIII] NMR spectra of isolated intermediates:

**Ethyl 4-cyclopropyl-2-hydroxy-4-oxobut-2-enoate **3**:**

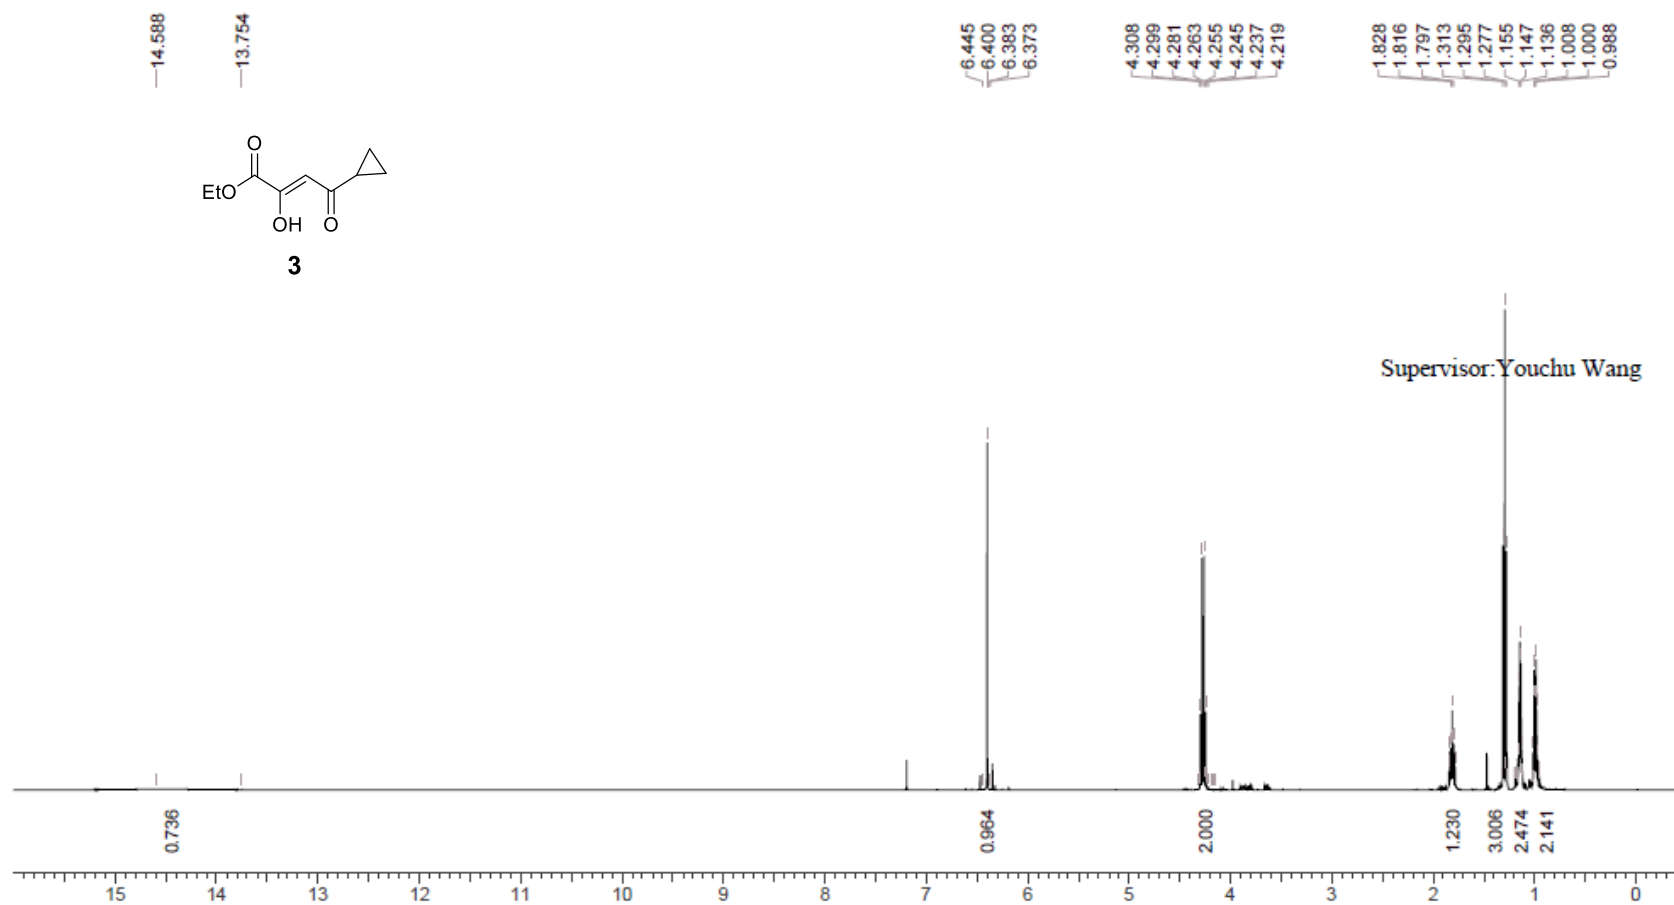

**Figure S1.**  $^1\text{H}$  NMR of (Z)-4-cyclopropyl-2-hydroxy-4-oxobut-2-enoate **3** in  $\text{CDCl}_3$ .



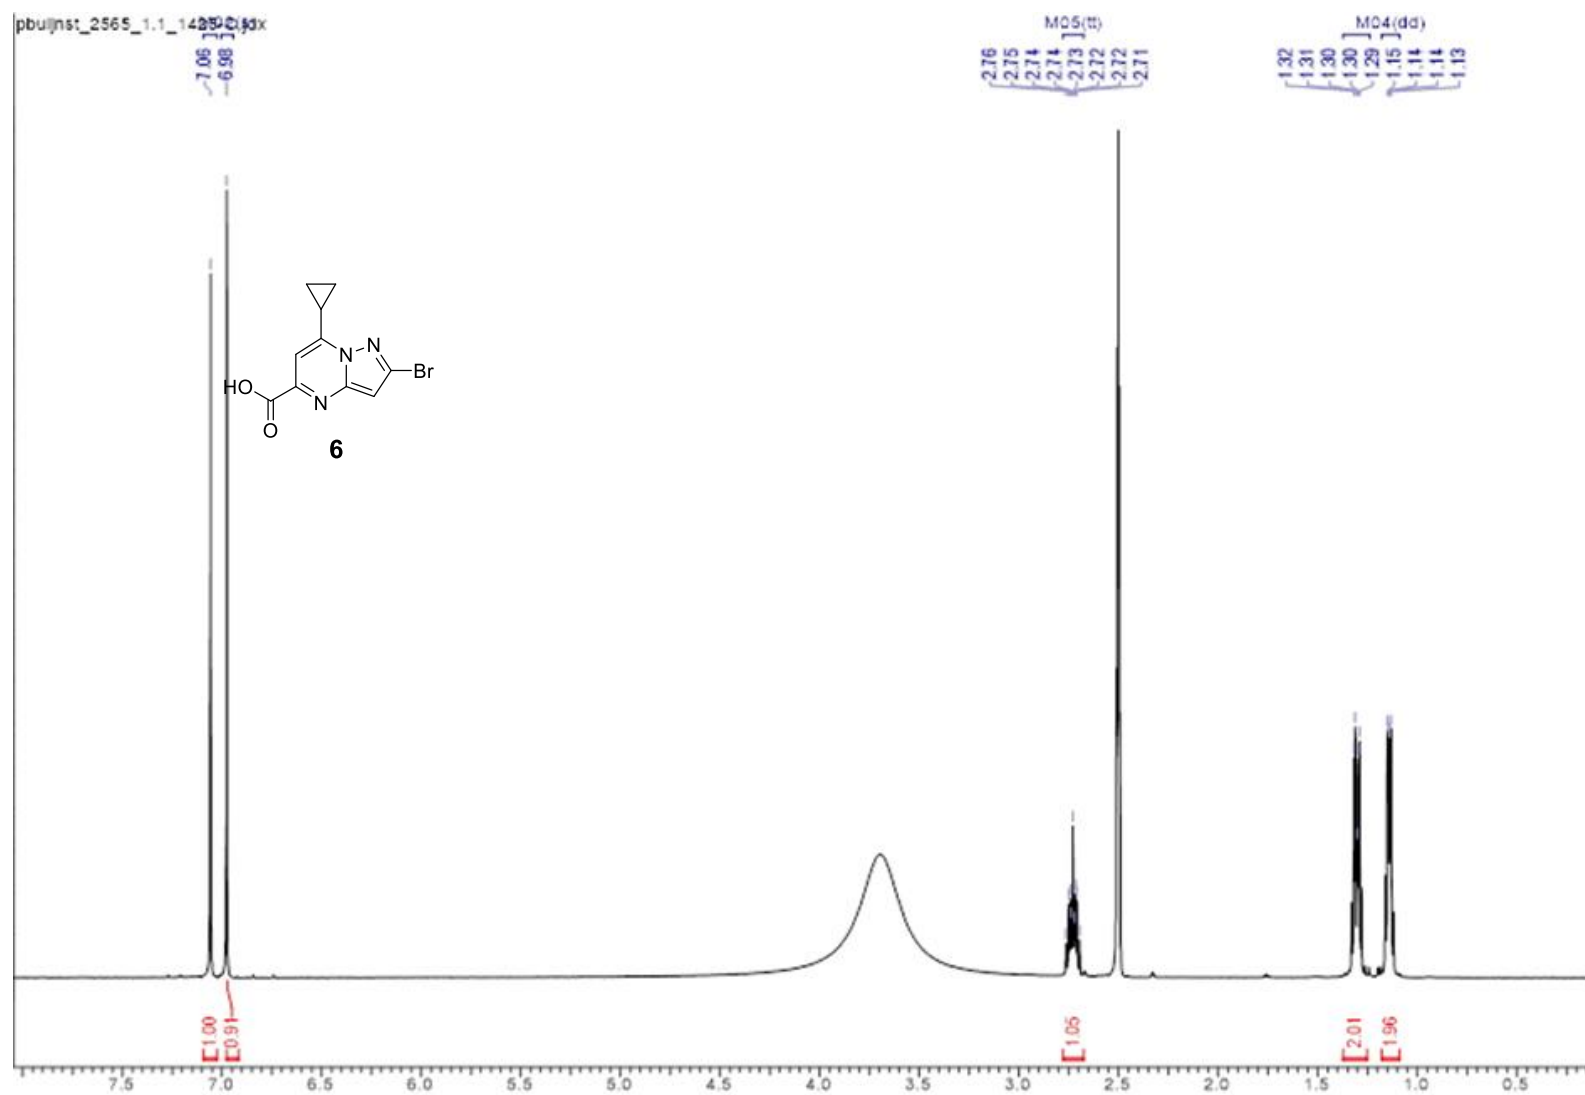

**Figure S2.**  $^1\text{H}$  NMR of bromo-7-cyclopropylpyrazolo[1,5-a]pyrimidine-5-carboxylic acid **6** in  $\text{d}_6\text{-DMSO}$ .

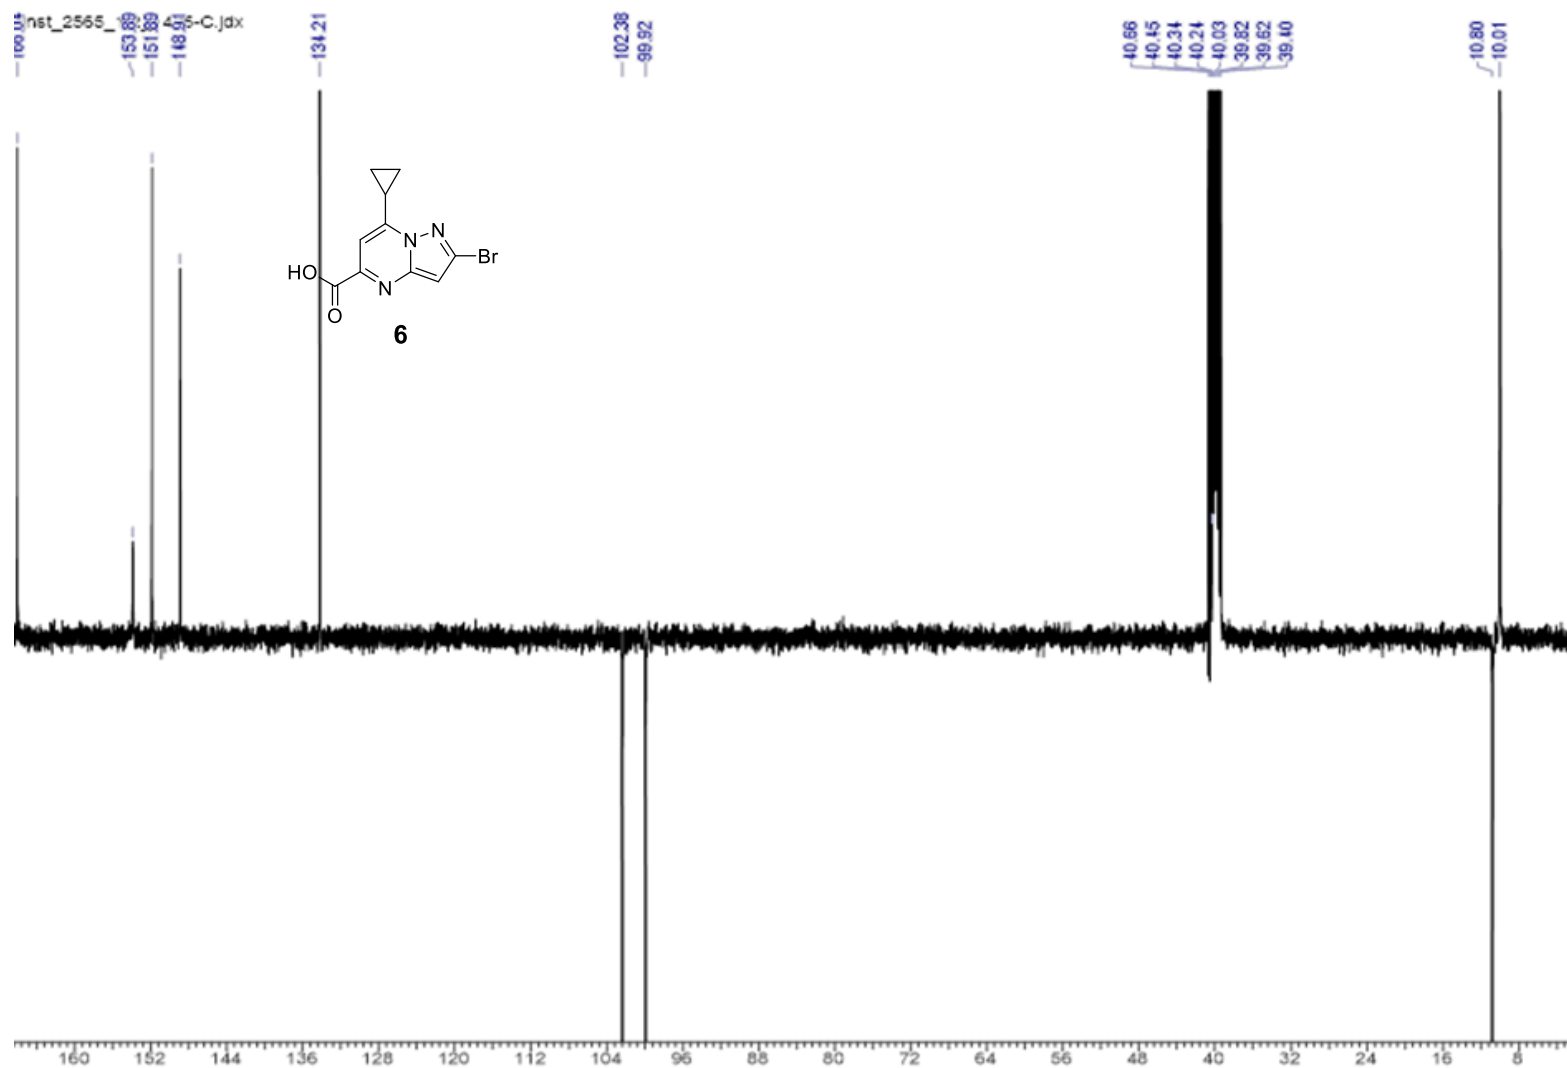

**Figure S3.** <sup>13</sup>C NMR of bromo-7-cyclopropylpyrazolo[1,5-*a*]pyrimidine-5-carboxylic acid **6** in d<sub>6</sub>-DMSO.

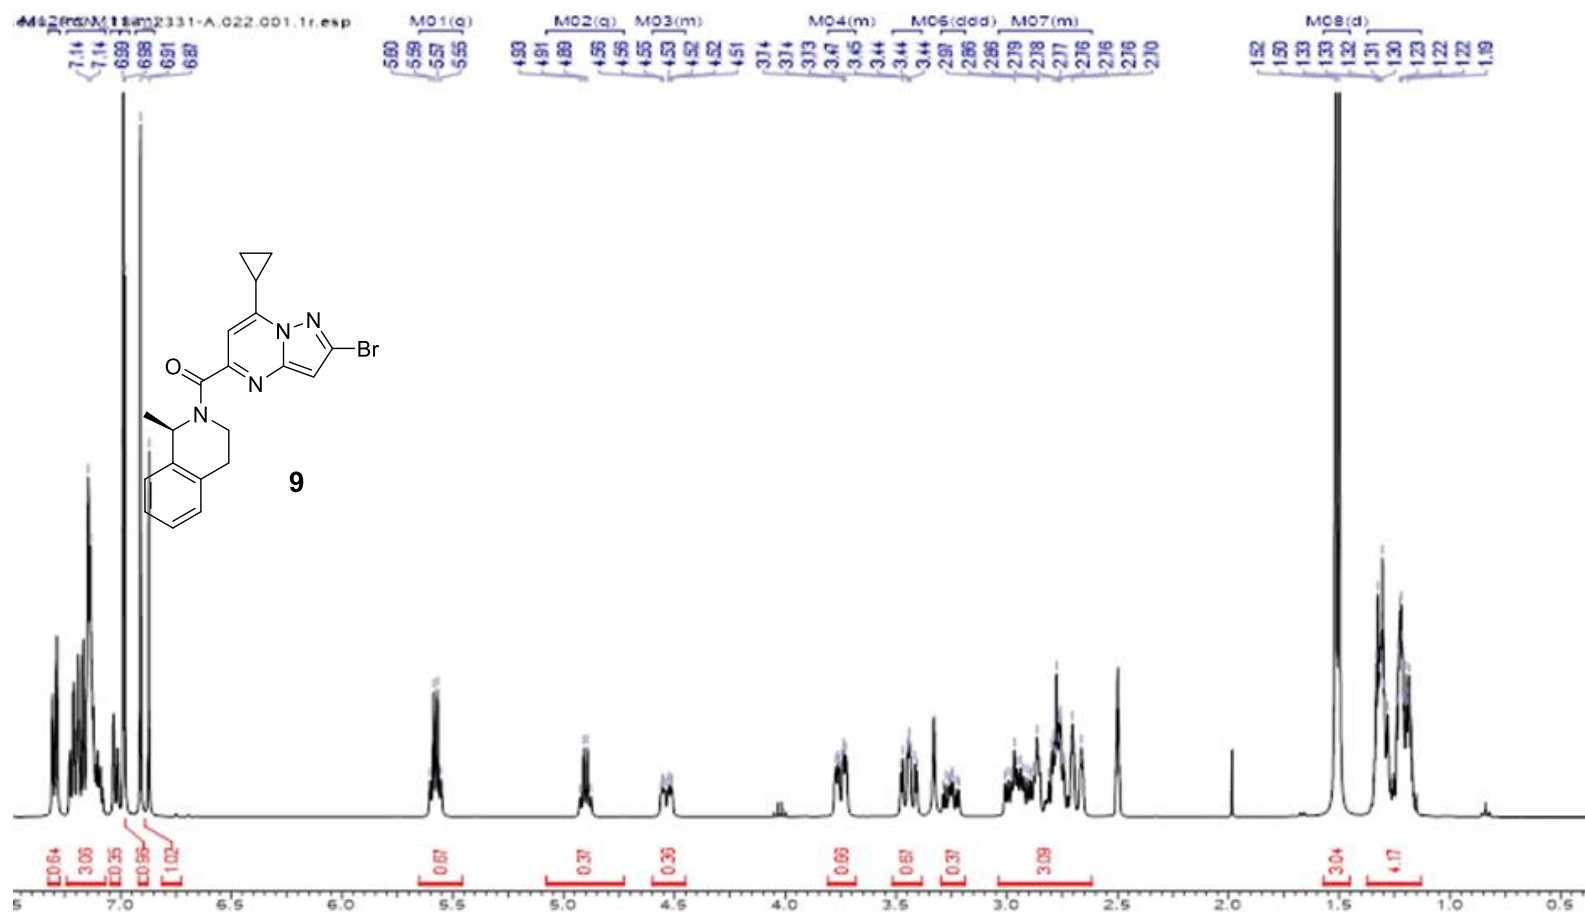

**Figure S4.** <sup>1</sup>H NMR of (*R*)-(2-bromo-7-cyclopropylpyrazolo[1,5-*a*]pyrimidin-5-yl)(1-methyl-3,4-dihydroisoquinolin-2(1*H*)-yl)methanone **9** in d<sub>6</sub>-DMSO.

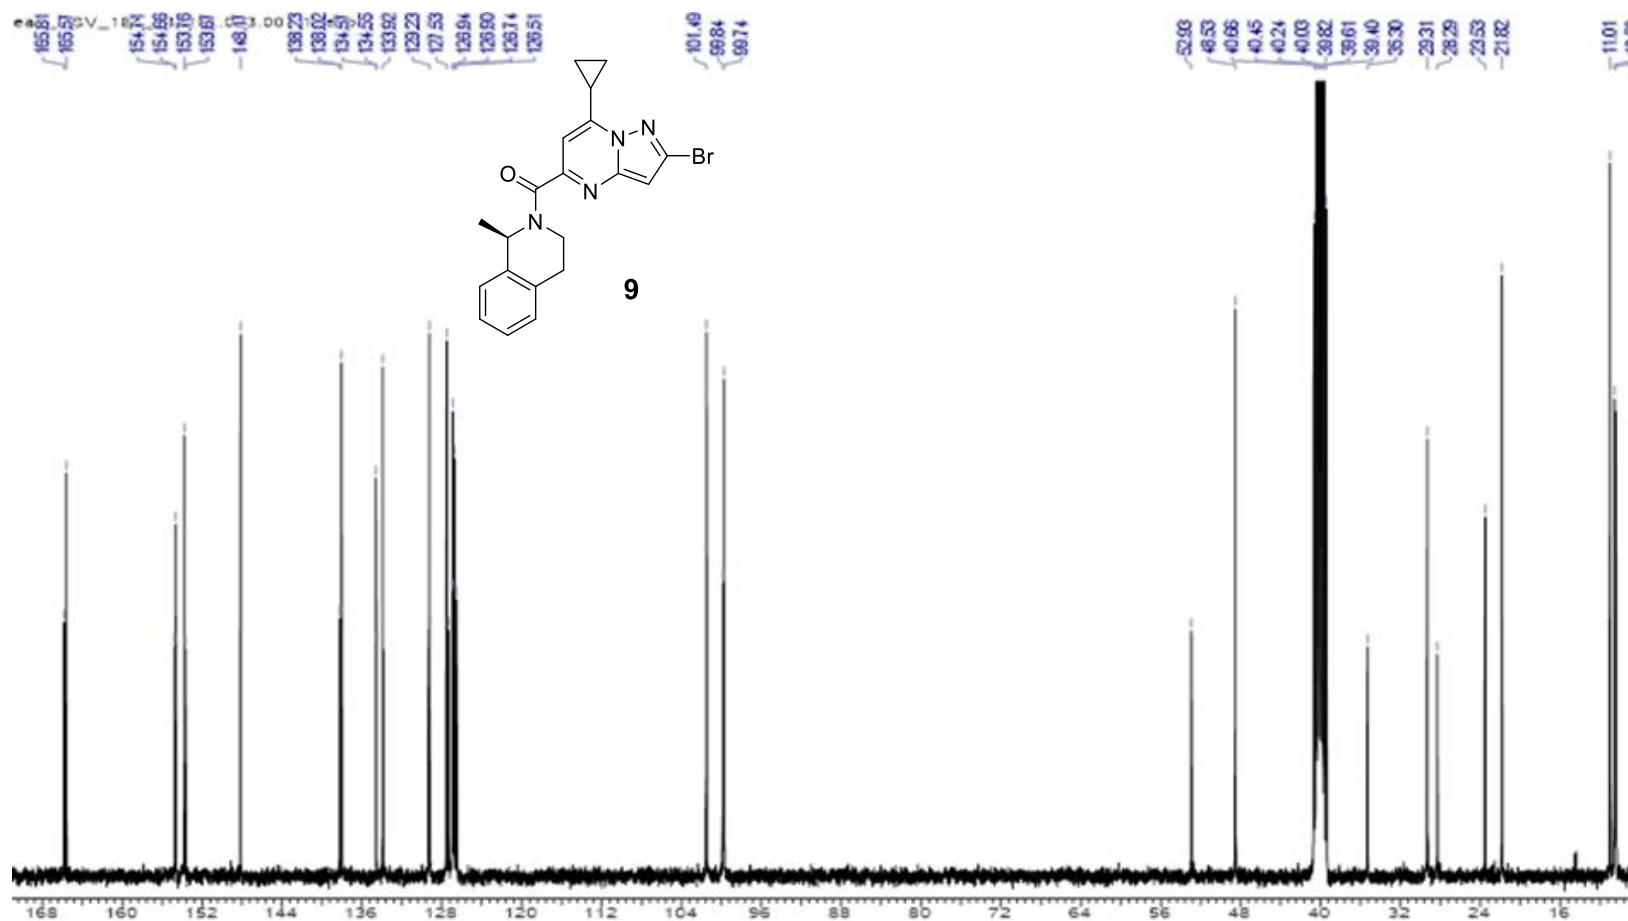

**Figure S5.** <sup>13</sup>C NMR of (*R*)-(2-bromo-7-cyclopropylpyrazolo[1,5-*a*]pyrimidin-5-yl)(1-methyl-3,4-dihydroisoquinolin-2(*1H*)-yl)methanone **9** in d<sub>6</sub>-DMSO.

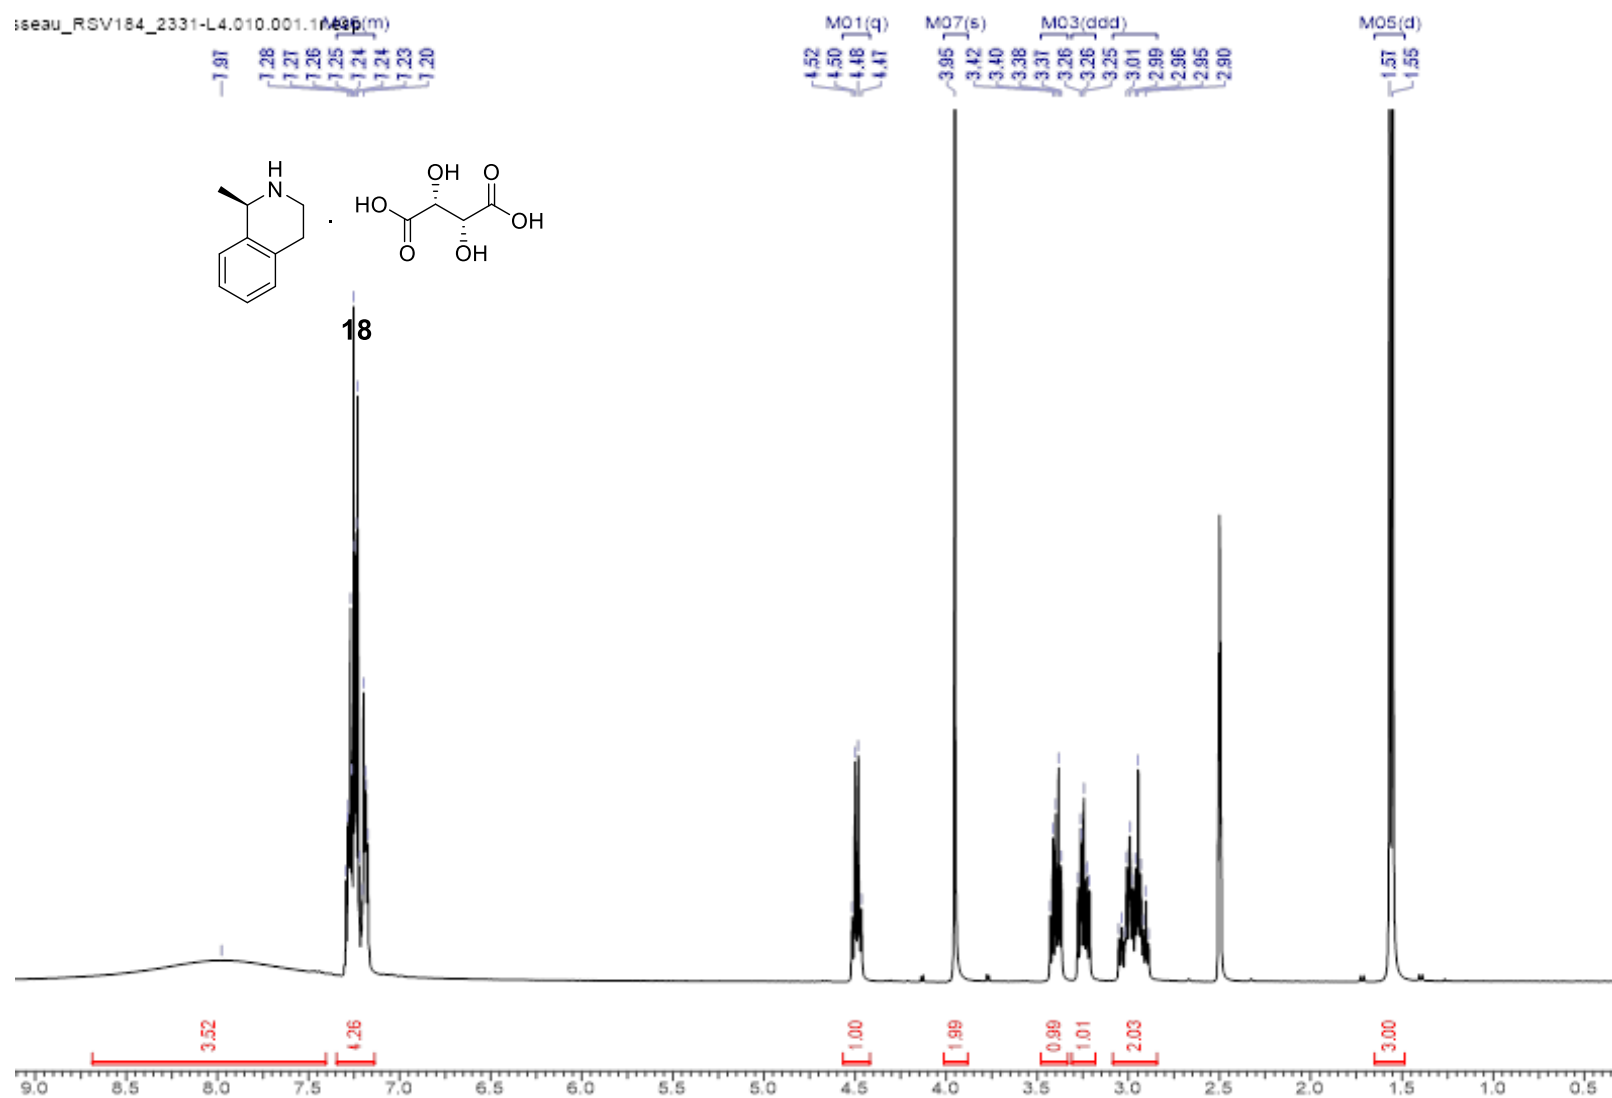

**Figure S6.**  $^1\text{H}$  NMR of (*R*)-1-methyl-1,2,3,4-tetrahydroisoquinoline mono-(*L*)-tartrate **18** in  $\text{d}_6\text{-DMSO}$ .

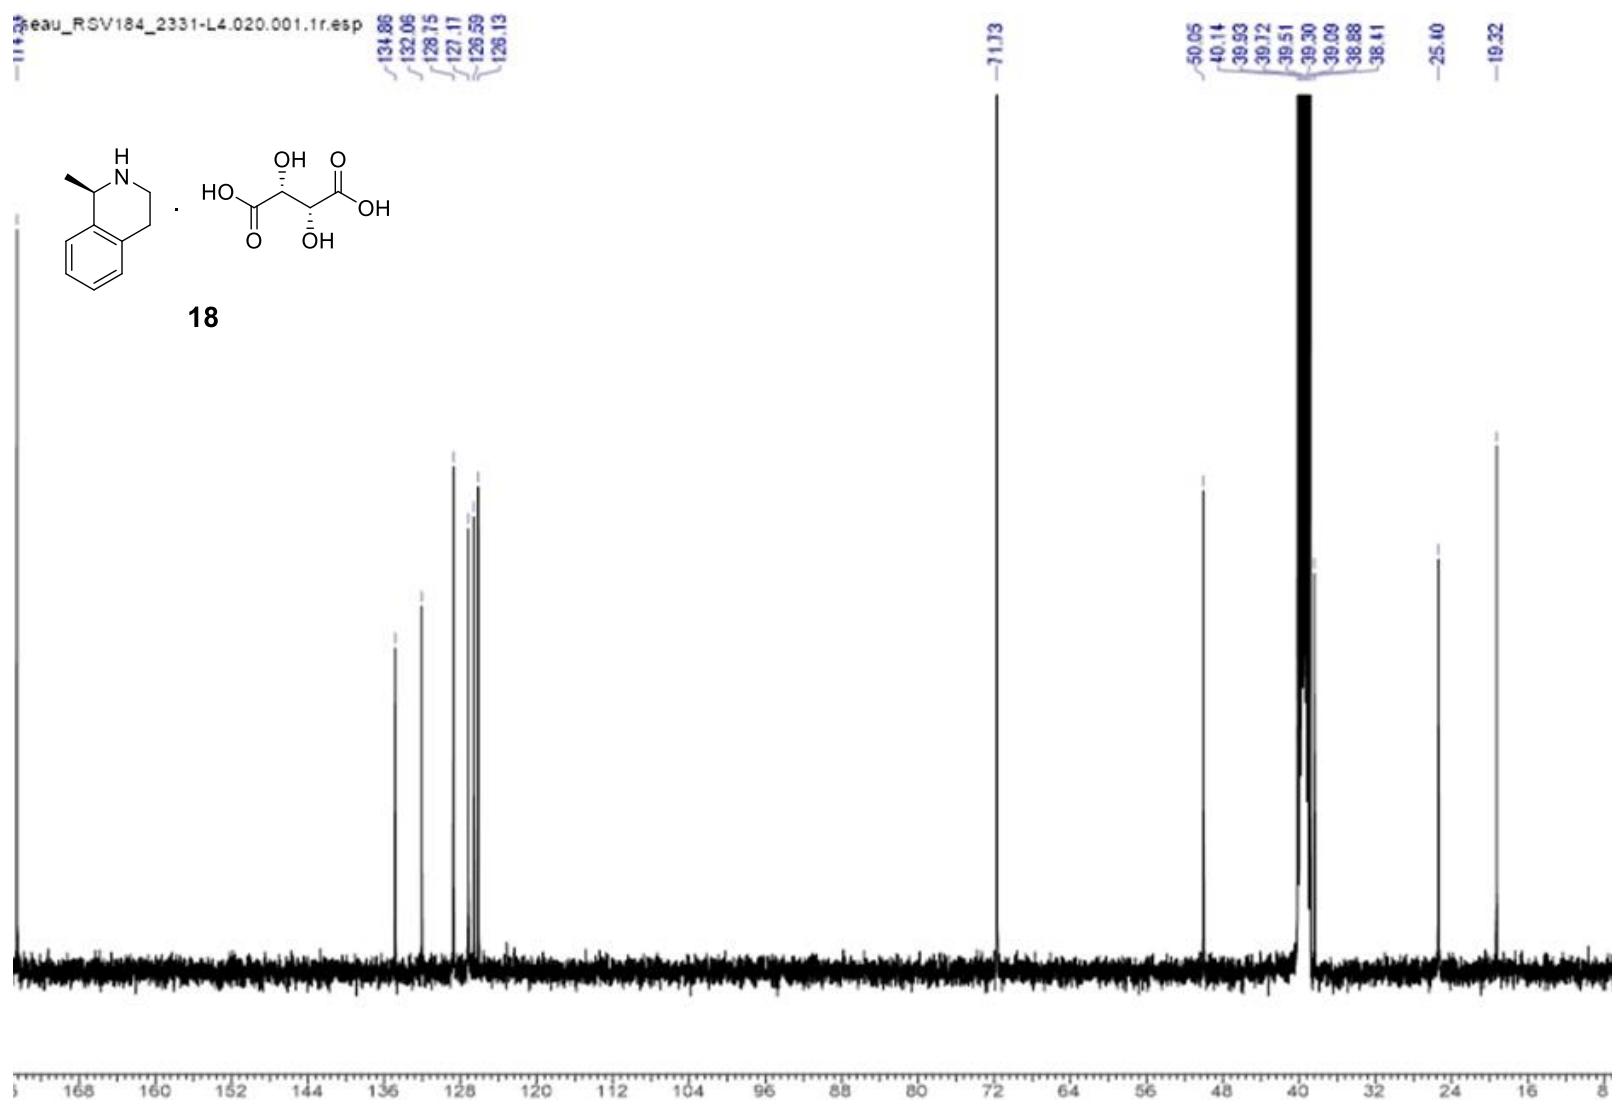

**Figure S7.**  $^{13}\text{C}$  NMR of (*R*)-1-methyl-1,2,3,4-tetrahydroisoquinoline mono-(*L*)-tartrate **18** in  $\text{d}_6\text{-DMSO}$ .

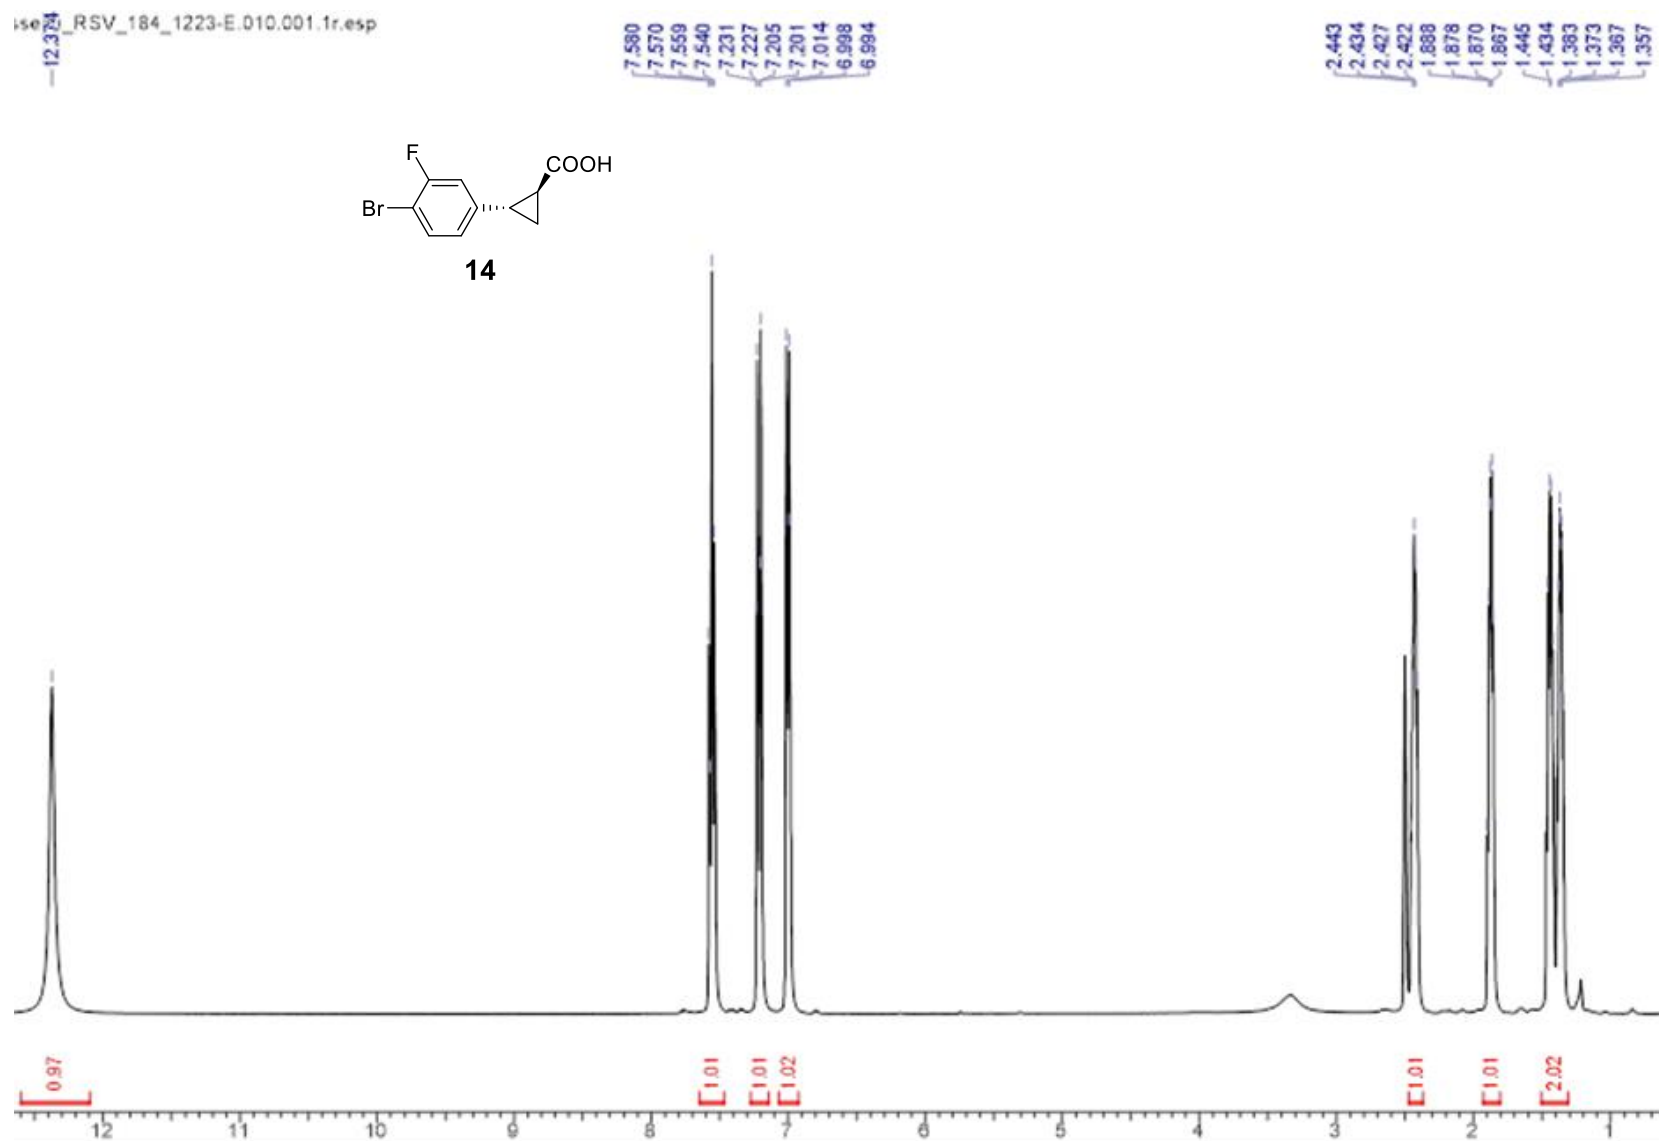

**Figure S8.**  $^1\text{H}$  NMR of (1*S*,2*S*)-2-(4-bromo-3-fluorophenyl)cyclopropanecarboxylic acid **14** in  $\text{d}_6\text{-DMSO}$ .

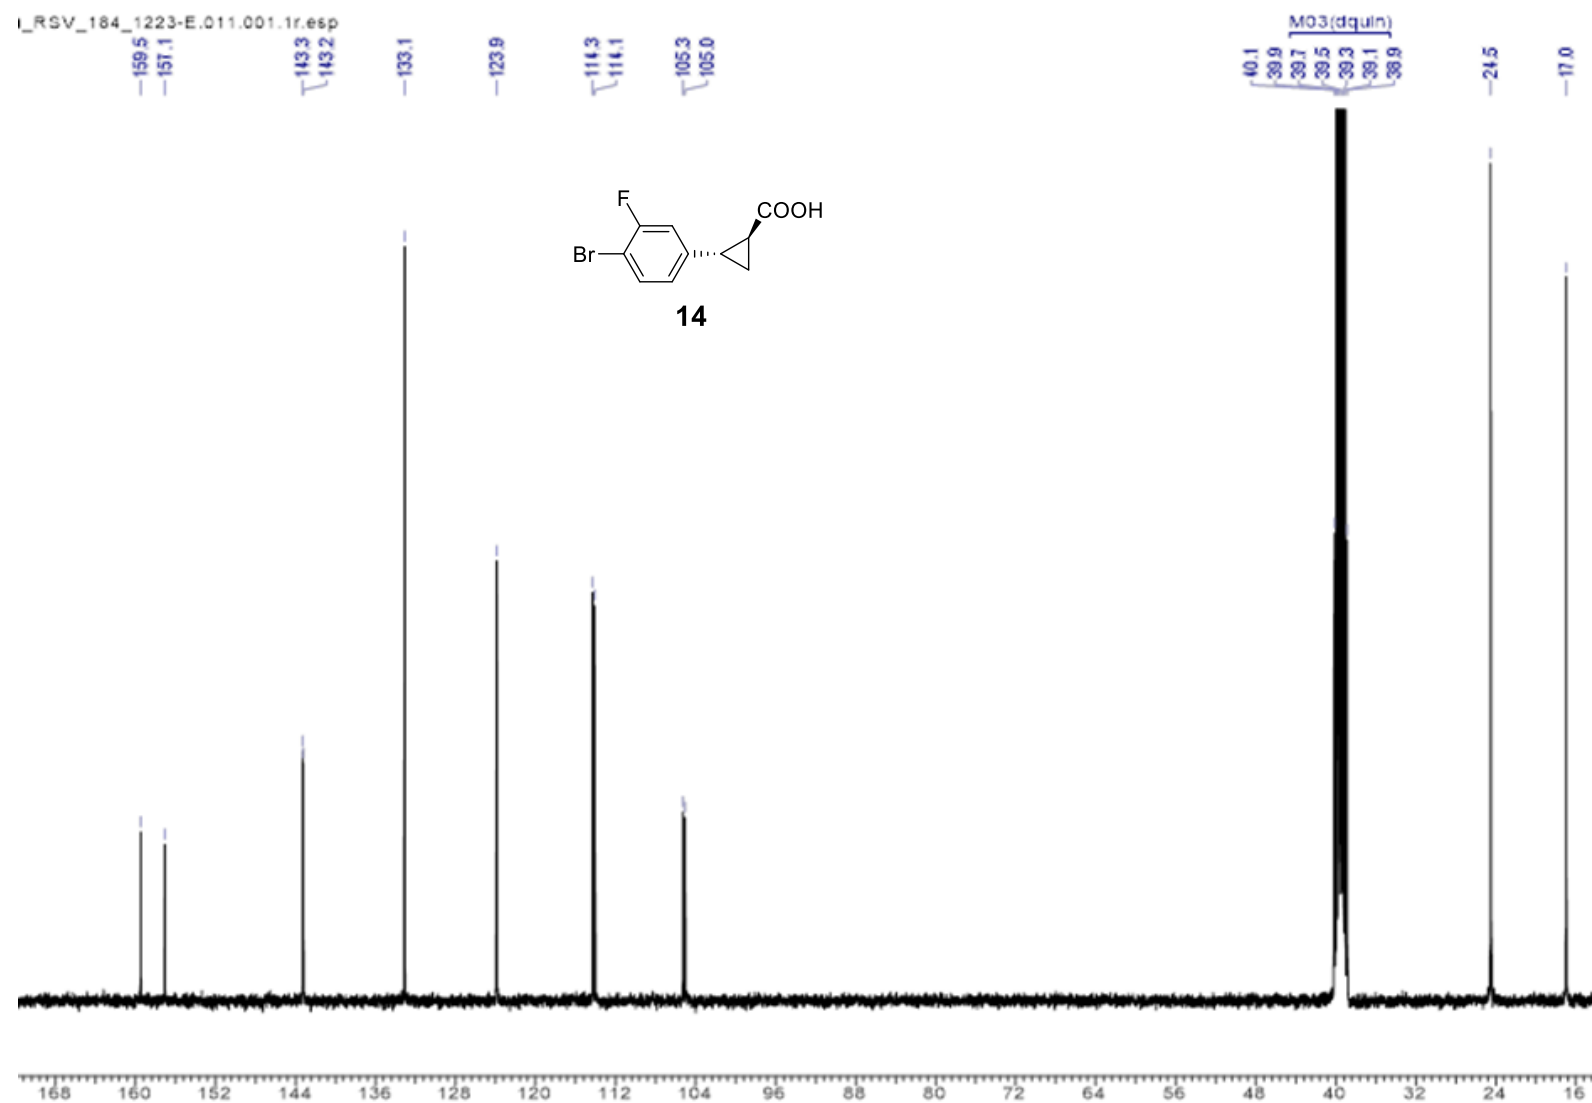

**Figure S9.**  $^{13}\text{C}$  NMR of (1*S*,2*S*)-2-(4-bromo-3-fluorophenyl)cyclopropanecarboxylic acid **14** in  $\text{d}_6\text{-DMSO}$ .



u\_RSV\_1223-E fluor.011.001.1r.esp

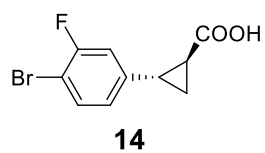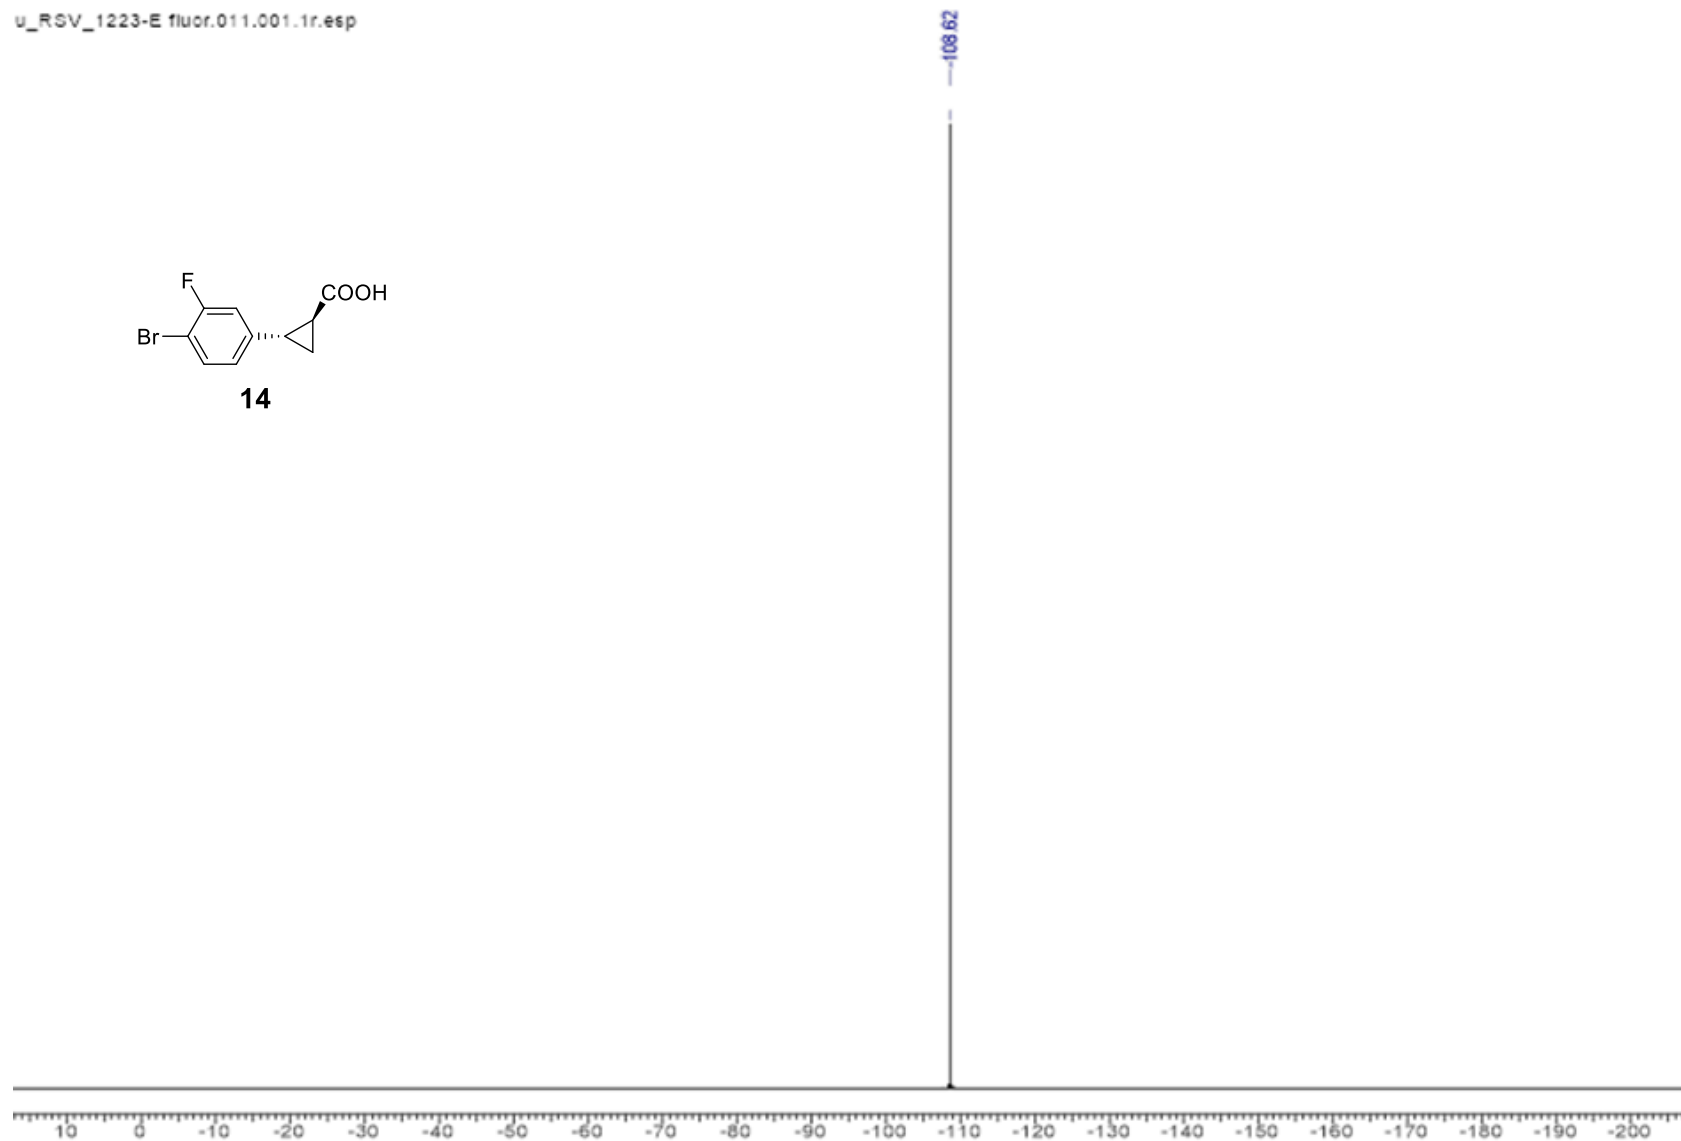

**Figure S10.**  $^{19}\text{F}$  NMR of (1*S*,2*S*)-2-(4-bromo-3-fluorophenyl)cyclopropanecarboxylic acid **14** in d<sub>6</sub>-DMSO.

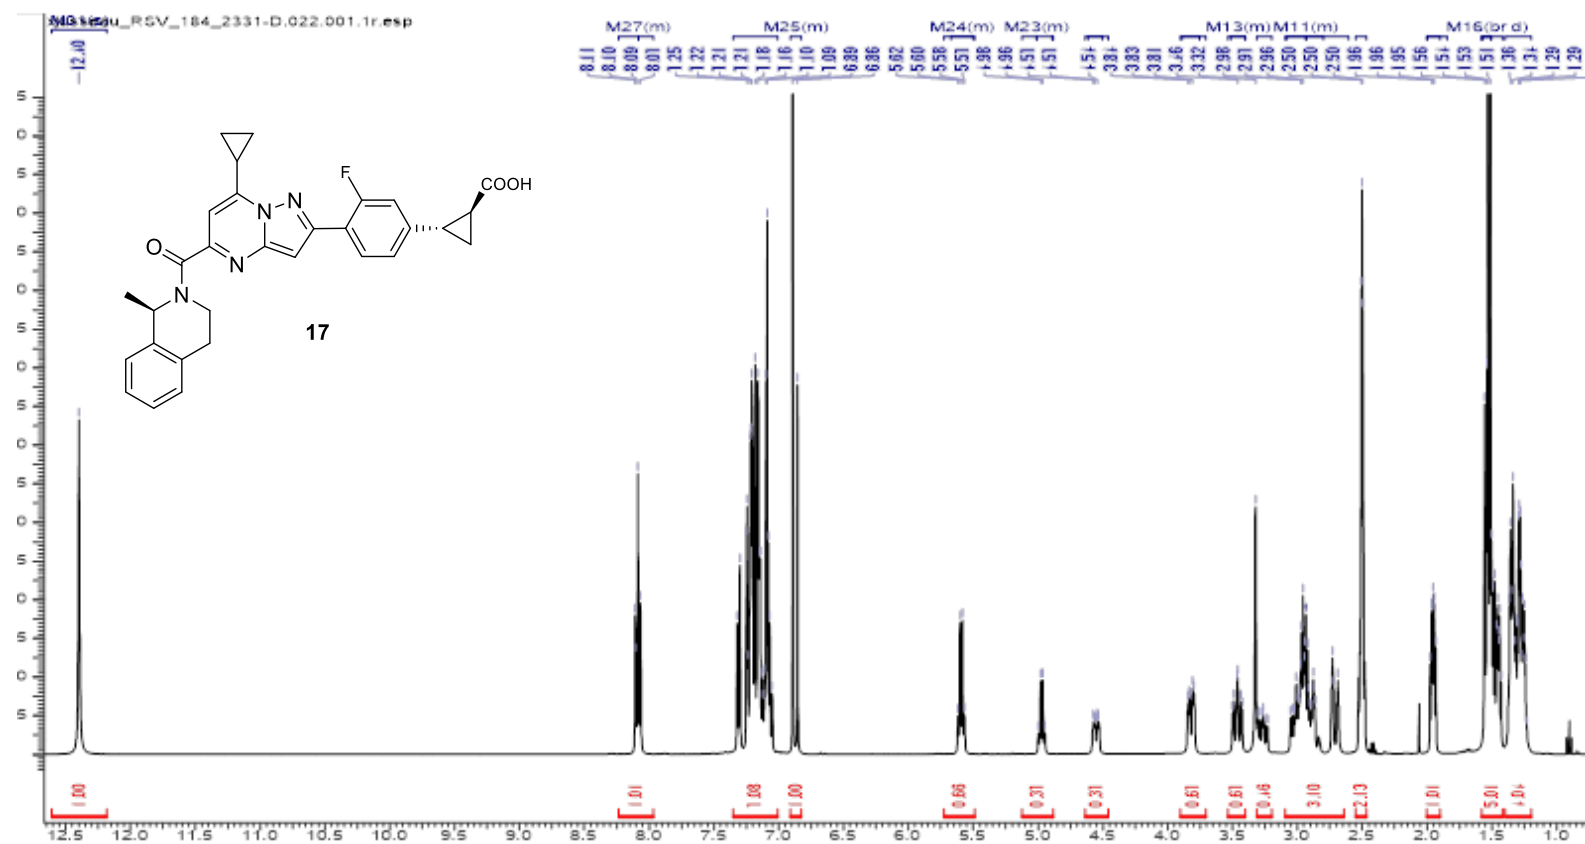

**Figure S11.** <sup>1</sup>H NMR of (1*S*,2*S*)-2-[4-(7-cyclopropyl-5-[[*(1R)*-1-methyl-3,4-dihydroisoquinolin-2(*1H*)-yl]carbonyl]pyrazolo[1,5-*a*]pyrimidin-2-yl)-3-fluorophenyl]cyclopropanecarboxylic acid **17** in d<sub>6</sub>-DMSO.

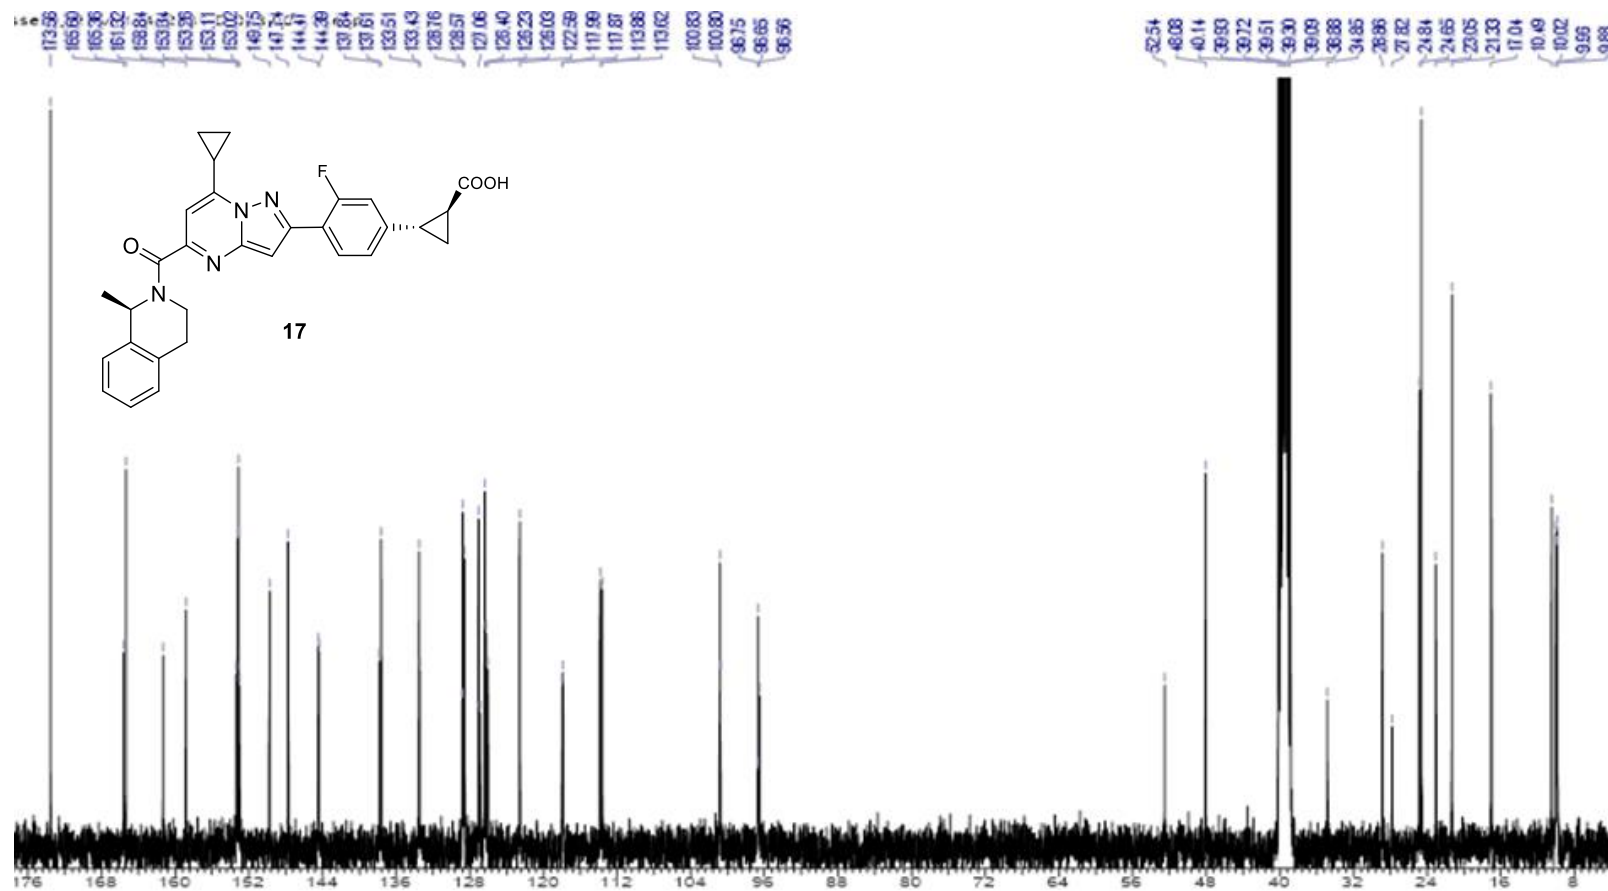

**Figure S12.** <sup>13</sup>C NMR of (1*S*,2*S*)-2-[4-(7-cyclopropyl-5-[[*(1R)*-1-methyl-3,4-dihydroisoquinolin-2(*1H*)-yl]carbonyl]pyrazolo[1,5-*a*]pyrimidin-2-yl)-3-fluorophenyl]cyclopropanecarboxylic acid **17** in d<sub>6</sub>-DMSO.

seau\_RSV\_2331-D fluor.023.001.1r.esp

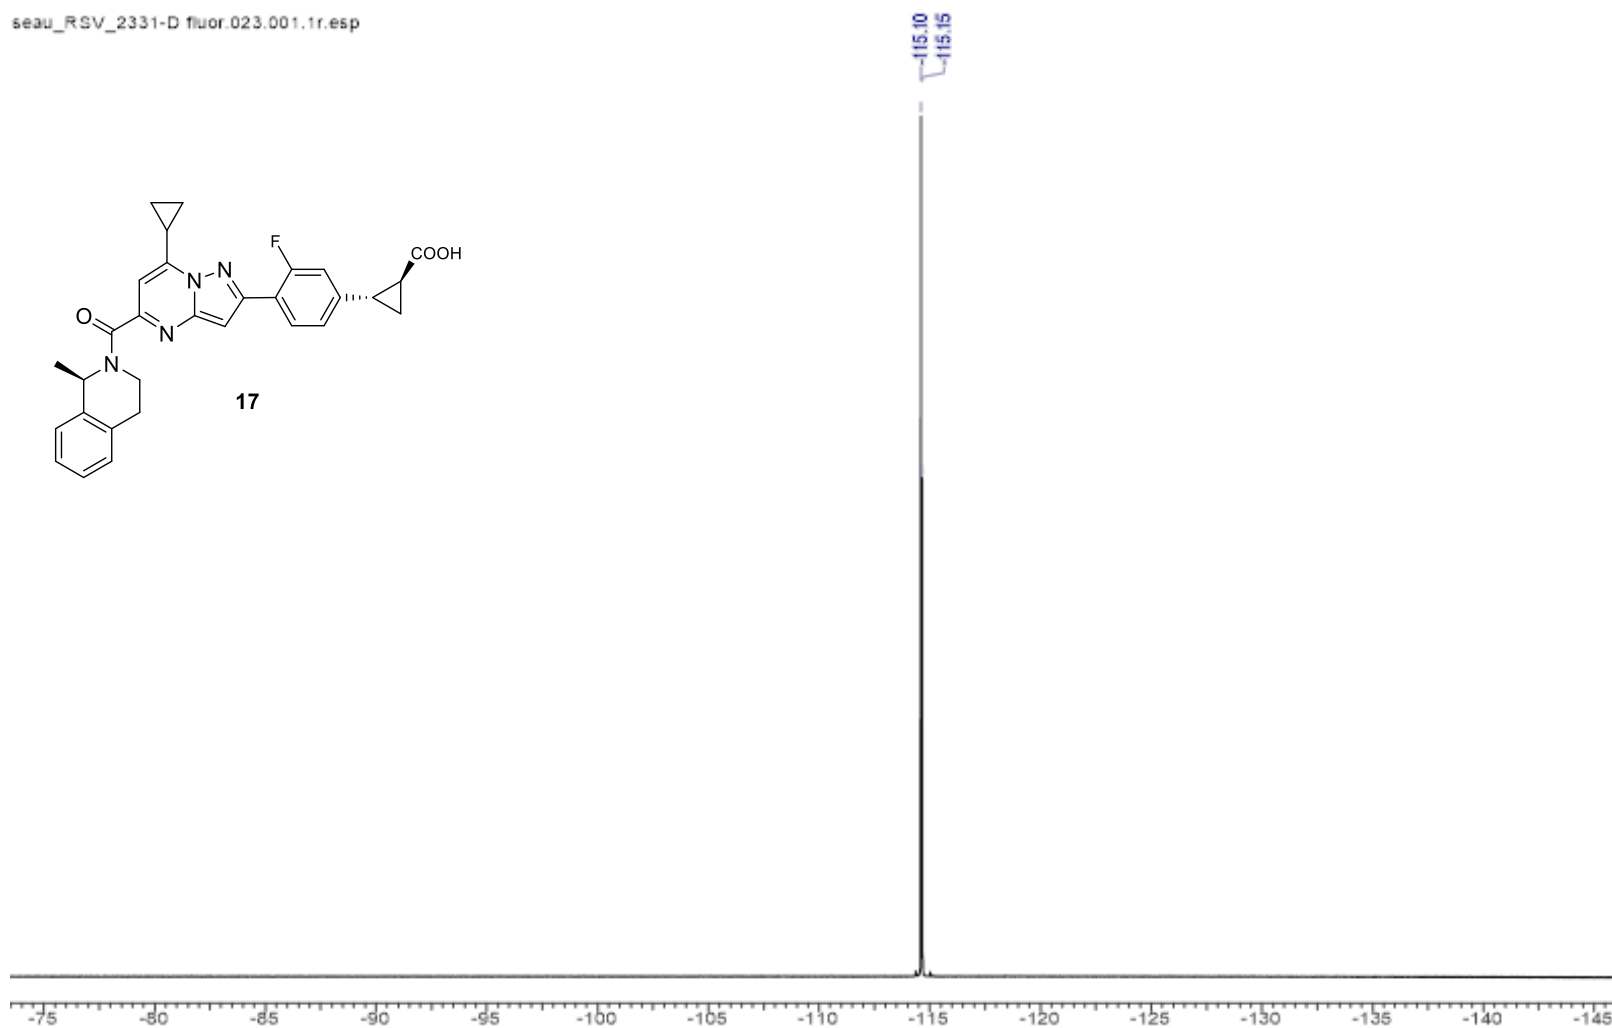

**Figure S13.**  $^{19}\text{F}$  NMR of (1*S*,2*S*)-2-[4-(7-cyclopropyl-5-[[*(1R)*]-1-methyl-3,4-dihydroisoquinolin-2(1*H*)-yl]carbonyl]pyrazolo[1,5-*a*]pyrimidin-2-yl)-3-fluorophenyl]cyclopropanecarboxylic acid **17** in  $\text{d}_6\text{-DMSO}$ .

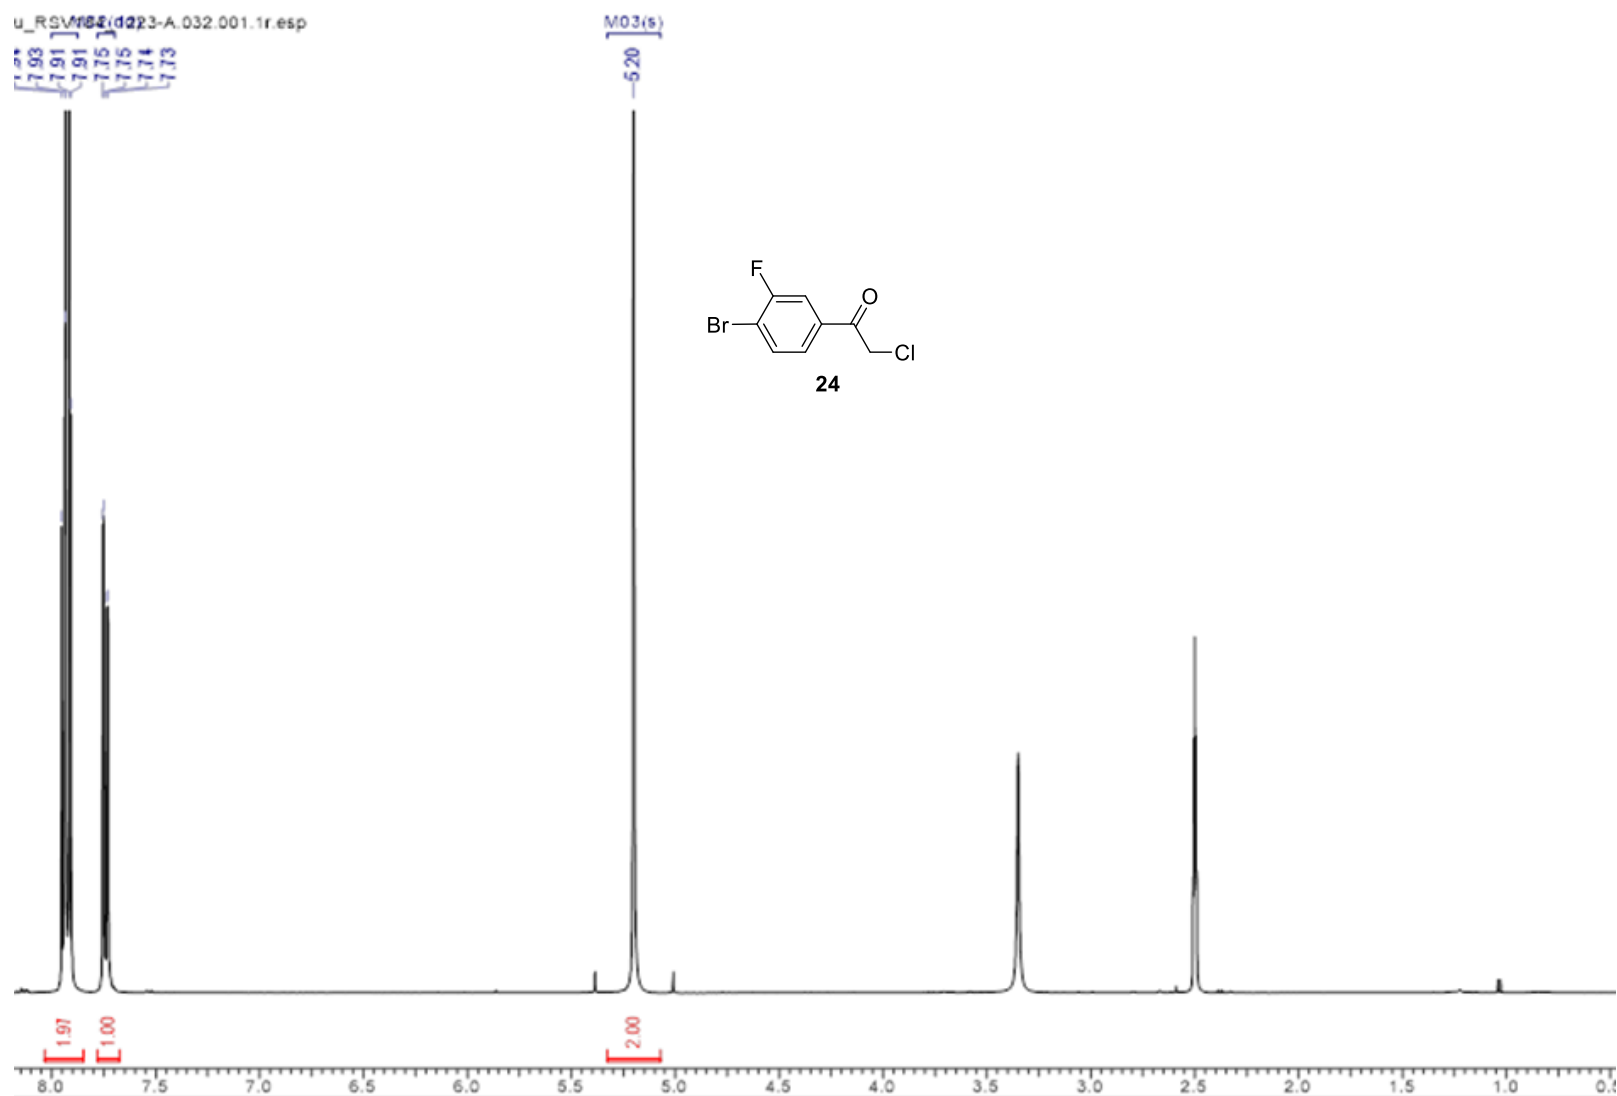

**Figure S14.** <sup>1</sup>H NMR of (1-(4-bromo-3-fluorophenyl)-2-chloroethan-1-one **24** in d<sub>6</sub>-DMSO.

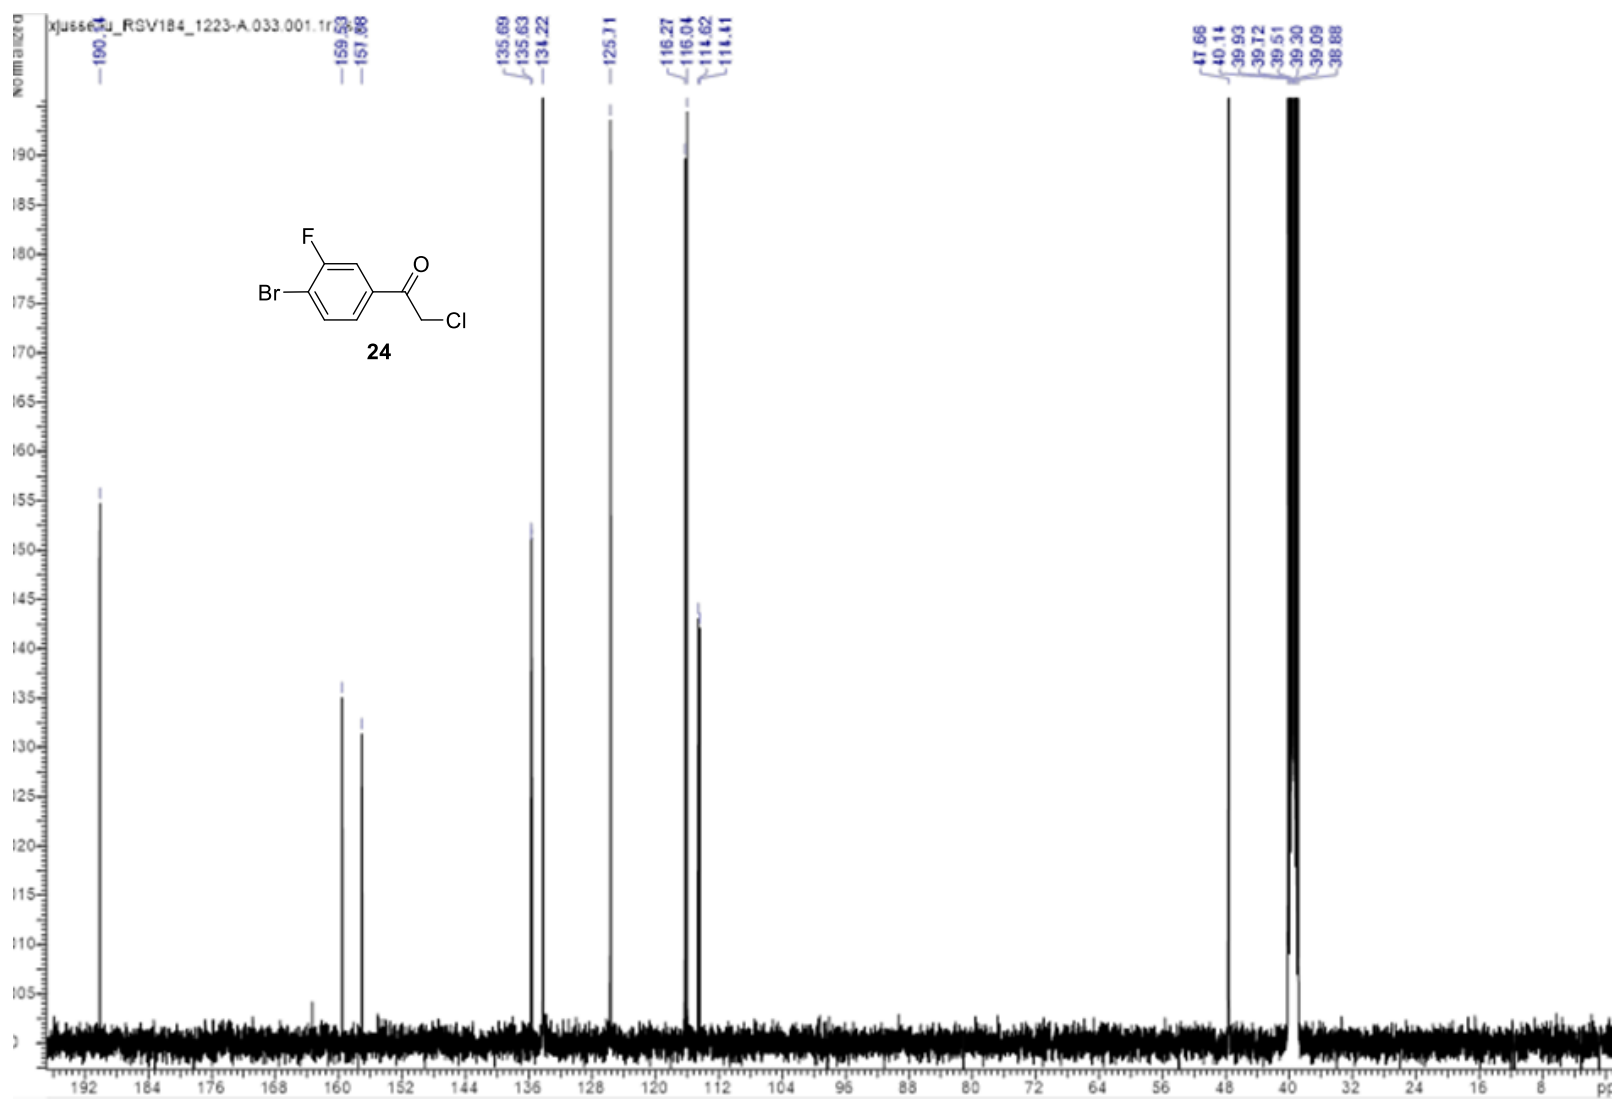

**Figure S15.** <sup>13</sup>C NMR of (1-(4-bromo-3-fluorophenyl)-2-chloroethan-1-one **24** in d<sub>6</sub>-DMSO.

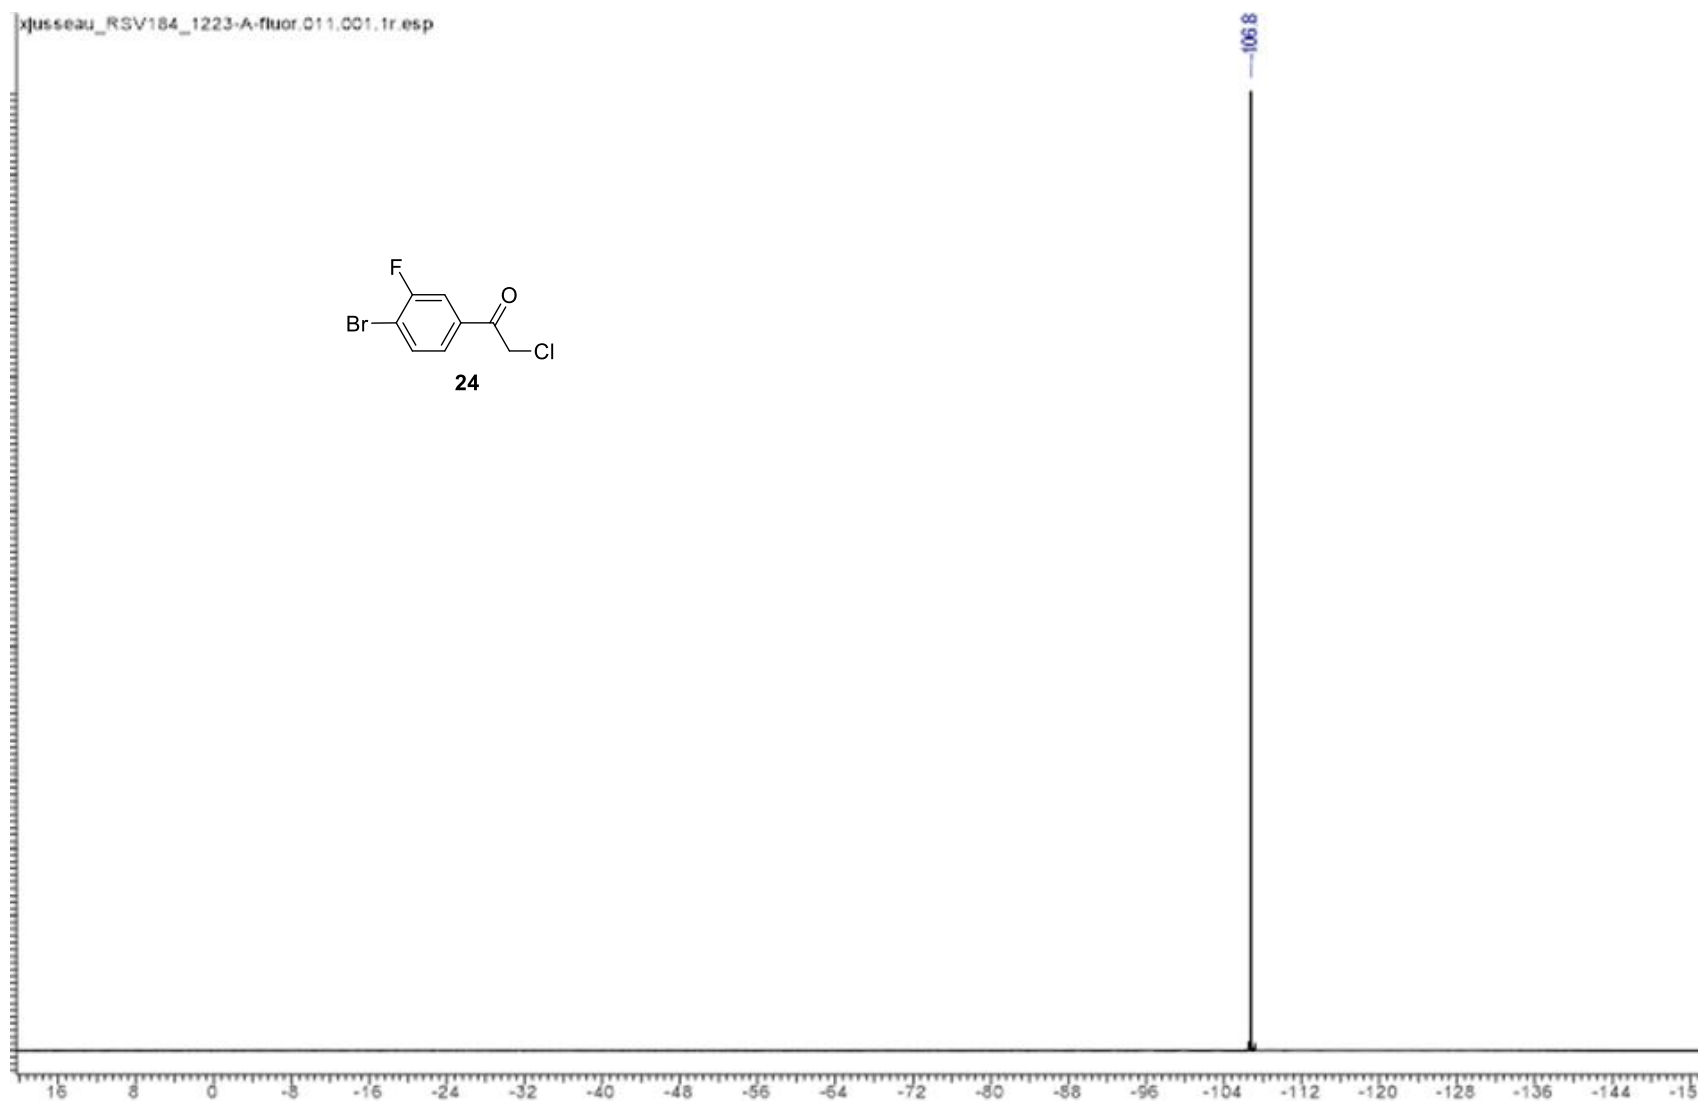

**Figure S16.**  $^{19}\text{F}$  NMR of (1-(4-bromo-3-fluorophenyl)-2-chloroethan-1-one **24** in  $\text{d}_6\text{-DMSO}$ .

## IX] Original and new synthesis route description (PMI included):

### Scheme S2: Original process synthesis route.

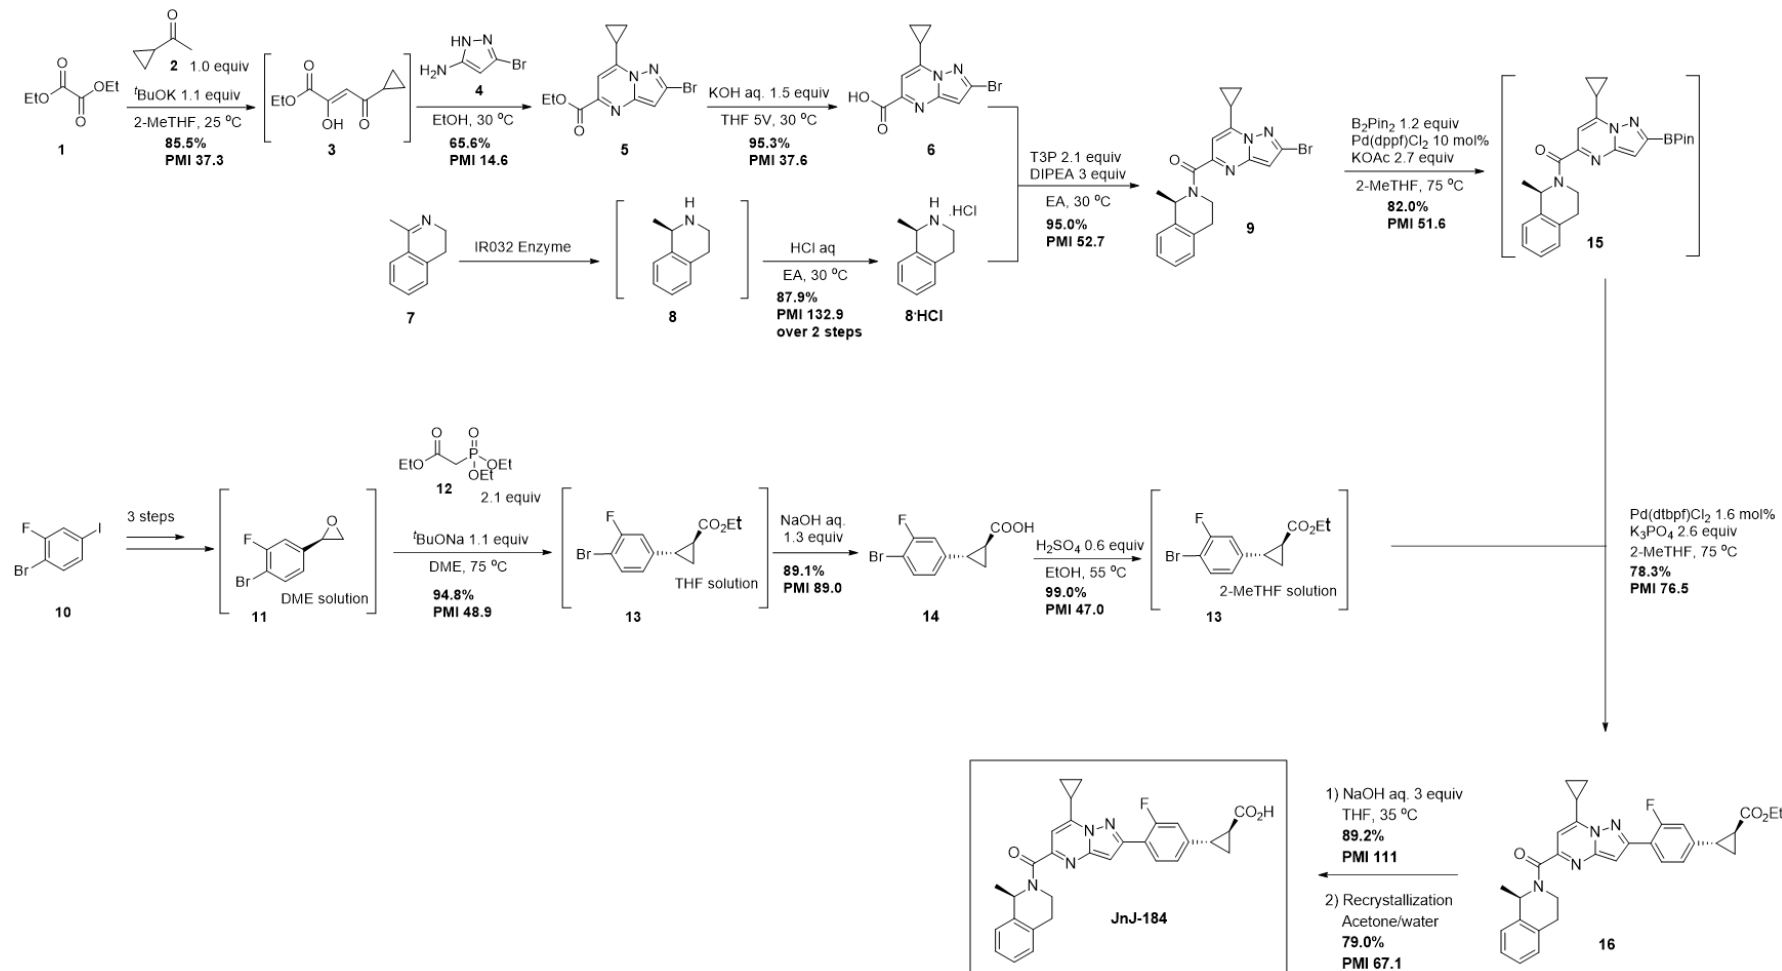



**Scheme S3: New synthesis route with new steps in blue.**

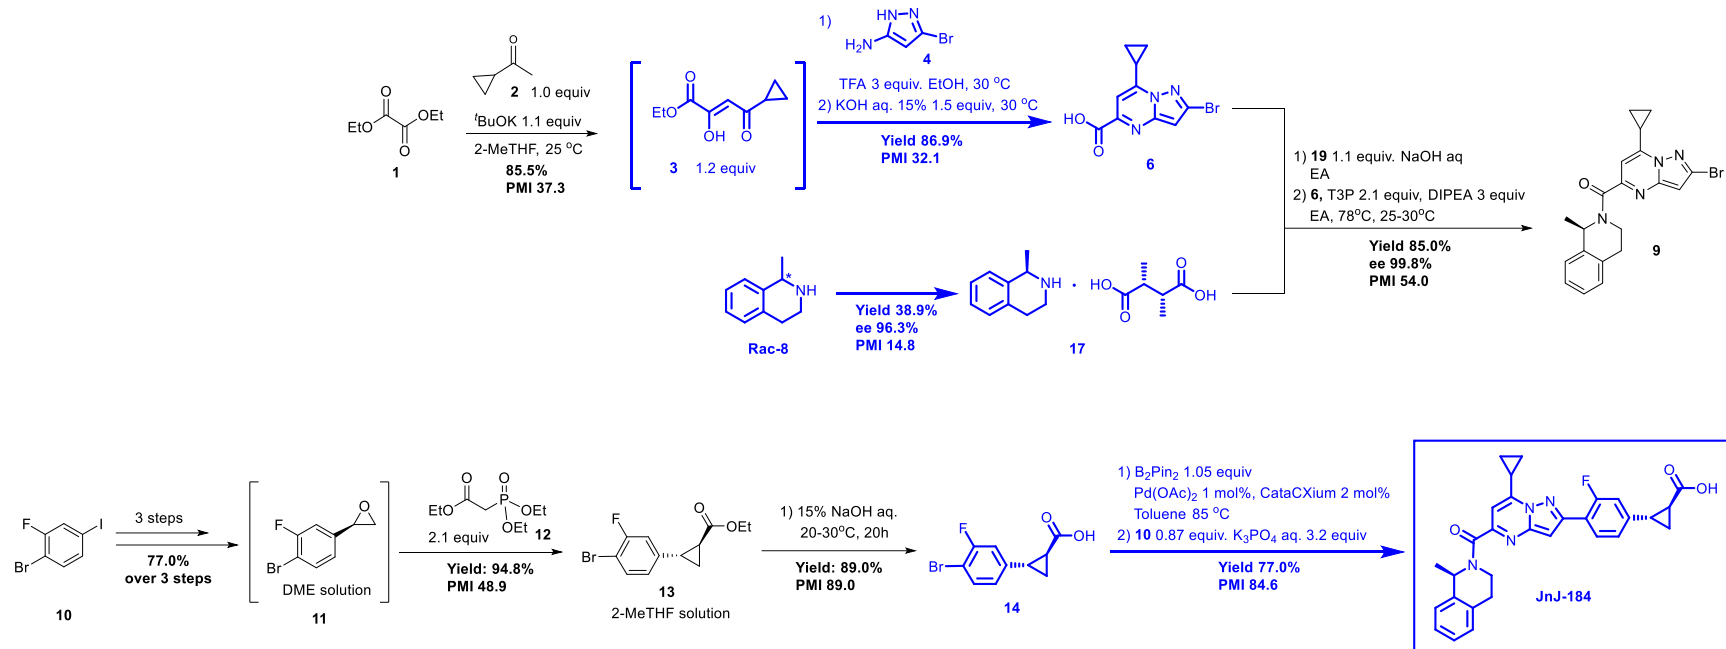

Supplement: Supplementary file 1 [file 31308092]
